1 **LmbU directly regulates *SLINC\_RS02575*, *SLINC\_RS05540* and *SLINC\_RS42780*, which are located outside**  
2 **the *lmb* cluster and inhibit lincomycin biosynthesis in *Streptomyces lincolnensis***

3 **Bingbing Hou<sup>1,2</sup> · Xianyan Zhang<sup>1,2</sup> · Yue Mao<sup>1,2</sup> · Ruida Wang<sup>1,2</sup> Jiang Ye<sup>1,2,\*</sup> · Haizhen Wu<sup>1,2\*</sup> · Huizhan**  
4 **Zhang<sup>1,2</sup>**

5  
6 <sup>1</sup>State Key Laboratory of Bioreactor Engineering, East China University of Science and Technology, Shanghai,  
7 China

8 <sup>2</sup>Department of Applied Biology, East China University of Science and Technology, Shanghai, China

9  
10 **Address correspondence to:**

11 Jiang Ye [yyji413@163.com](mailto:yyji413@163.com)

12 Haizhen Wu [wuhzh@ecust.edu.cn](mailto:wuhzh@ecust.edu.cn)

13 Tel: +86-21-64252507

14 Fax: +86-21-64252507

15

16 **Running title:** LmbU regulates the genes outside the *lmb* cluster

17

18 **ABSTRACT**

19 The productions of antibiotics are usually regulated by cluster-situated regulators (CSRs), which can directly regulate  
20 the genes within the corresponding biosynthetic gene cluster (BGC). However, few studies have looked into the  
21 regulation of CSRs on the targets outside the BGC. Here, we screened the targets of LmbU in the whole genome of *S.*  
22 *lincolnensis*, and found 14 candidate targets, among of which, 8 targets can bind to LmbU by EMSAs. Reporter  
23 assays *in vivo* revealed that LmbU repressed transcription of *SLINC\_RS02575* and *SLINC\_RS05540*, while activated  
24 transcription of *SLINC\_RS42780*. In addition, disruptions of *SLINC\_RS02575*, *SLINC\_RS05540* and  
25 *SLINC\_RS42780* promoted the production of lincomycin, and qRT-PCR showed that *SLINC\_RS02575*,  
26 *SLINC\_RS05540* and *SLINC\_RS42780* inhibited transcription of the *lmb* genes, indicating that all the three  
27 regulators can negatively regulate lincomycin biosynthesis. What's more, the homologues of LmbU and its targets  
28 *SLINC\_RS02575*, *SLINC\_RS05540* and *SLINC\_RS42780* are widely found in actinomycetes, while the  
29 distributions of DNA-binding sites (DBS) of LmbU are diverse, indicating the regulatory mechanisms of LmbU  
30 homologues in various strains are different and complicated.

31 **IMPORTANCE** Lincomycin is widely used in clinic treatment and animal husbandry. Our previous study firstly  
32 demonstrated that LmbU, a novel transcriptional regulator family, functions as a CSR and positively regulates  
33 lincomycin biosynthesis. Here, we revealed that LmbU may act as a pleiotropic transcriptional regulator, and directly  
34 regulates *SLINC\_RS02575*, *SLINC\_RS05540* and *SLINC\_RS42780* which are located outside the *lmb* cluster and  
35 negatively regulate lincomycin biosynthesis. Interestingly, the homologues of LmbU and its targets are widely found  
36 in actinomycetes, indicating the regulatory patterns of LmbU to the targets may exist in a variety of strains.  
37 Collectively, our findings elucidated the molecular mechanism with which LmbU regulates the target genes outside

38 the *lmb* cluster, and draw a network diagram of LmbU regulation on lincomycin biosynthesis. This lays a solid  
39 foundation for the realization of high-yield of lincomycin in industry, and provides the theoretical basis for the  
40 functional research of LmbU family proteins.

41

42 **KEYWORDS** *Streptomyces lincolnensis* lincomycin biosynthesis transcriptional regulation LmbU

43 cluster-situated regulator

44

## 45 **Introduction**

46 Streptomyces are high G+C, filamentous Gram-positive bacteria. In order to cope with the complex and  
47 changeable living environment, Streptomyces evolved a set of protective mechanisms with competitive advantages  
48 (1, 2). In this process, a large number of secondary metabolites were produced, including antibiotics with high  
49 medical value (3-5). Antibiotic biosynthesis is stringently controlled by precise and pyramidal regulatory cascades  
50 (6). *Streptomyces* will monitor the environmental conditions, growing states, population density, and so on, and then  
51 secrete and sense specific signal small molecules named autoregulators, including  $\gamma$ -butyrolactones (GBLs),  
52 antibiotics and biosynthetic intermediates (7-9). Then, the receptors response and transmit these signal inputs to  
53 transcriptional regulators, thereby regulating corresponding antibiotics biosynthesis. Transcriptional regulators in  
54 *Streptomyces* are usually classified as global/pleiotropic regulators and CSRs (10). The global/pleiotropic regulators  
55 can sense a variety of signals, and not only regulate the biosynthesis of secondary metabolites, but also affect the  
56 morphological differentiation of *Streptomyces* (11, 12). The biosynthetic genes of each antibiotic exist in clusters,  
57 usually including one or more CSRs, which are at the bottom of the secondary metabolic regulatory network, and  
58 directly regulate transcription of the corresponding antibiotics synthetic genes, thus regulating antibiotics  
59 biosynthesis (10, 13).

60 More and more studies have shown that the targets of CSRs are not limited to the gene cluster in which they are  
61 situated, but also located in disparate antibiotic biosynthetic gene clusters, forming cross-regulation. For instance,  
62 FscRI, a CSR of candicidin gene cluster in *Streptomyces albus* S4, regulates candicidin biosynthesis as well as  
63 antimycin biosynthesis (14). In *Streptomyces autolyticus* CGMCC0516, the geldanamycin CSR GdmRIII was found  
64 to up-regulate the production of geldanamycin and down-regulate that of elaiophylin by affecting the transcription of

65 the genes in both gene clusters (15). In *Streptomyces venezuelae*, the jadomycin CSR JadR1 can not only activate  
66 jadomycin biosynthesis by directly binding to the promoter region of *jadJ*, but also repress chloramphenicol  
67 biosynthesis by directly binding to the promoter region of *cmfJ* in chloramphenicol gene cluster (16, 17). Similar  
68 examples are also found in coordinated cephamycin C and clavulanic acid biosynthesis by CcaR in *Streptomyces*  
69 *clavuligerus* (18), RED, ACT and CDA biosynthesis by RedZ in *Streptomyces coelicolor* (19), and avermectin and  
70 oligomycin biosynthesis by AveR in *Streptomyces avermitilis* (20). Though cases of cross-regulation of disparate  
71 antibiotics by one CSR have been reported, screening of the targets of CSRs which located outside the corresponding  
72 antibiotics BGSs is barely reported. A case was recently showed that in *Streptomyces cyaneogriseus* ssp.  
73 *noncyanogenus*, nemadectin CSR NemR functions as a pleiotropic regulator, which not only activates the  
74 transcription of the genes within nemadectin BGC, but also regulates four targets outside the BGC (21).  
75 Lincomycin, one of the lincosamide antibiotics, was isolated from a soil-derived Gram-positive bacterium  
76 *Streptomyces lincolnensis* in 1962 (22). The 35-kb BGC of lincomycin (*lmb*) contains 25 structural genes (23), three  
77 resistance genes (24), and one CSR (25). The structure of lincomycin A is composed of propylproline (PPL) and  
78  $\alpha$ -methylthiolincosaminide (MTL), and the biosynthesis of lincomycin comes to light mainly in the recent 10 years  
79 (26-31). However, few studies have be reported to elucidate the regulation mechanism of lincomycin biosynthesis. In  
80 our previous study, we firstly identified a novel CSR LmbU within lincomycin BGC, and showed that LmbU can  
81 positively regulate lincomycin biosynthesis (25). Subsequently, we demonstrated that two global/pleiotropic  
82 regulators BldA and AdpA positively regulate lincomycin biosynthesis and morphological differentiation, which  
83 function at translational levels and transcriptional levels, respectively (32, 33). Later, Xu et al. showed that a TetR  
84 family regulator SLCG\_2919 can bind to the promoter regions of lincomycin biosynthetic genes, and directly

85 inhibits lincomycin biosynthesis (34). Li et al. demonstrated that BldD, a famous global regulator, is beneficial to  
86 lincomycin biosynthesis and sporulation (35). Xu et al. revealed that a leucine-responsive regulatory protein  
87 SLCG\_Lrp promotes lincomycin biosynthesis by directly activating transcription of the biosynthetic genes,  
88 resistance genes and CSR of lincomycin (36).

89 In our previous study, we characterized LmbU as a CSR of lincomycin biosynthetic gene cluster, and demonstrated  
90 that LmbU homologues are widely found in actinomycetes, indicating LmbU might regulate other target genes  
91 except for *lmb* genes. In the present study, we demonstrated that LmbU negatively regulates transcription of  
92 *SLINC\_RS02575* and *SLINC\_RS05540*, while positively regulates transcription of *SLINC\_RS42780*. In addition, we  
93 showed that *SLINC\_RS02575*, *SLINC\_RS05540* and *SLINC\_RS42780* can all inhibit the production of lincomycin by  
94 repressing transcription of *lmb* genes.

95

## 96 **Materials and methods**

### 97 **Bacterial strains, plasmids and culture conditions**

98 Bacterial strains and plasmids used in this study are listed in Table 1. *Escherichia coli* strains are and *S. lincolnensis*  
99 strains were described in our previous study. Moreover, YEME medium (10 g/L yeast extract, 5 g/L polypeptone, 10  
100 g/L glucose, 3 g/L malt extract, 5 mM MgCl<sub>2</sub>•2H<sub>2</sub>O, 340 g/L sucrose) was used for preparation *S. lincolnensis*  
101 mycelium for conjugation, ISP4 medium (10 g/L soluble starch, 1 g/L K<sub>2</sub>HPO<sub>4</sub>, 5 g/L MgSO<sub>4</sub>•7H<sub>2</sub>O, 1 g/L NaCl, 2  
102 g/L (NH<sub>4</sub>)<sub>2</sub>SO<sub>4</sub>, 2 g/L CaCO<sub>3</sub>, 15 g/L Agar, 0.001 g/L FeSO<sub>4</sub>•7H<sub>2</sub>O, 0.001 g/L MnCl<sub>2</sub>•4H<sub>2</sub>O, 0.001 g/L ZnSO<sub>4</sub>•7H<sub>2</sub>O,  
103 0.02 mol/L MgCl<sub>2</sub>) was used for conjugation of *E. coli* and *S. lincolnensis*.

### 104 **Expression and purification of His<sub>6</sub>-LmbU**

105 The expression plasmid pLU-1 (25) was transformed into *E. coli* BL21 (DE3), and used for His<sub>6</sub>-LmbU expression.  
106 The strain was cultivated in 100 mL LB medium at 37 °C until OD<sub>600</sub> reached about 0.6, 1 mM Isopropyl  
107 β-D-1-thiogalactopyranoside (IPTG) was added. After overnight cultivation at 16 °C, the cells were washed twice  
108 and suspended in PBS buffer (0.1 M phosphate buffer solution, pH 7.5). Total proteins were released by sonication  
109 and His<sub>6</sub>-LmbU was purified using nickeliminodiacetic acid–agarose chromatography (WeiShiBoHui, China). After  
110 dialysis and concentration, the purified protein was stored in binding buffer (10 mM Tris-HCl [pH 8.0], 1 mM EDTA,  
111 0.2 mM dithiothreitol, 20 g/ml bovine serum albumin, 1.2% glycerol).

### 112 **Electrophoretic Mobility Shift Assay (EMSA)**

113 DNA probes of around 200 bp containing the binding sites of LmbU were amplified via two rounds of PCR. Firstly,  
114 primer pairs UBS-X-F/R (X indicates the numbers of the 14 putative targets of LmbU) were used to amplify the cold  
115 probes without biotin. Then, biotin-labeled primer EMSA-B\* was used for the second-round PCR to generate the

116 labeled probes. The probe prepared by primer pair nag-F/R was used as a negative control. EMSAs were performed  
117 as described previously using chemiluminescent EMSA kits (Beyotime Biotechnology, China) with some  
118 modification in binding buffer, which included 10 mM Tris-HCl (pH 8.0), 1 mM EDTA, 0.2 mM dithiothreitol, 20  
119 g/ml bovine serum albumin, 1.2% glycerol, and 50 g/ml poly(dI-C) (25). EMSAs performed with 200-fold excesses  
120 of specific or nonspecific cold probes were added as controls to confirm the specificity of the band shifts.  
121 All primer pairs used in this study are listed in Table S1.

### 122 **Construction of *lmbU* disruption strain $\Delta lmbU$**

123 To construct a *lmbU* disruption strain, the internal region of *lmbU* (465 bp) was deleted via a CRISPR/Cas9-based  
124 genetic editing method (37). The *lmbU*-specific single-molecule-guide RNA (sgRNA) was amplified by PCR using  
125 the primer pair sgUF/R with pKCcas9dO as template. Upstream (1.2 kb) and downstream (1.2 kb) homologous arms  
126 of *lmbU* were amplified by PCR using primer pairs uU-F/R and dU-F/R, respectively. The *lmbU*-specific deletion  
127 cassette was assembled with the above three DNA fragments by using overlapping PCR. Subsequently, the deletion  
128 cassette was digested with *SpeI* and *HindIII*, and ligated into the corresponding sites of pKCcas9dO. The resulting  
129 plasmid pKCcas9dlmbU was introduced into *S. lincolnensis* NRRL 2936 by conjugation, using *E. coli* S17-1 as a  
130 donor. The conjugants were selected with nalidixic acid and apramycin, and then identified by PCR using the primer  
131 pair JDU-F/R and DNA sequencing. The pKCcas9dlmbU plasmid was eliminated through a few rounds of streak  
132 cultivation in YEME medium at 37 °C, which was identified by PCR using the primer pair CR1/2.

### 133 **Catechol dioxygenase activity analysis**

134 The regions upstream (relative to the translational start site) of *SLINC\_RS02575* (-578 to -1), *SLINC\_RS05540* (-471  
135 to -1) and *SLINC\_RS42780* (-427 to -1) were amplified using primer pairs p02575-F/R, p05540-F/R and p42780-F/R



136 respectively. The reporter gene *xyITE* was amplified by PCR using primer pair pA<sub>xyI</sub>-3/4, with pATE152 as a  
137 template. Two DNA fragments (promoter region and reporter gene) were cloned into the *PvuII* site of the integrative  
138 plasmid pSET152 using Super Efficiency Fast Seamless Cloning kits (Do Gene, China), resulting in reporter  
139 plasmids p02575TE, p05540TE and p42780TE. Then, the reporter plasmids were transferred into the wild-type strain  
140 NRRL 2936 and the *lmbU* disruption strain  $\Delta lmbU$ , to construct the reporter strains WT/p02575TE, WT/p05540TE,  
141 WT/p42780TE,  $\Delta lmbU$ /p02575TE,  $\Delta lmbU$ /p05540TE and  $\Delta lmbU$ /p42780TE.  
142 Catechol dioxygenase activity analysis was performed as described previously (32). Briefly, the reporter strains were  
143 cultivated in YEME medium at 28 °C for one day, then the cells were harvested and lysed by sonication. An  
144 appropriate amount of cell extract was added to the assay buffer (100 mM potassium phosphate, pH 7.5, 1 mM  
145 catechol), and the optical density at 375 nm was detected per minute. The rate of change per minute per milligram of  
146 protein was calculated as catechol dioxygenase activity.

#### 147 **Bioinformatics analysis (Functional domain analysis, sequence alignment and structure modeling)**

148 Functional domain analysis was performed by BlastP in National Center for Biotechnology Information (NCBI)  
149 ([https://blast.ncbi.nlm.nih.gov/Blast.cgi?PROGRAM=blastp&PAGE\\_TYPE=BlastSearch&LINK\\_LOC=blasthome](https://blast.ncbi.nlm.nih.gov/Blast.cgi?PROGRAM=blastp&PAGE_TYPE=BlastSearch&LINK_LOC=blasthome)).  
150 Sequence alignment was analyzed using the online software ESPript 3.0  
151 (<https://esprict.ibcp.fr/ESPript/cgi-bin/ESPript.cgi>). Structure modeling was constructed using the online software  
152 SWISS MODEL (<https://swissmodel.expasy.org/interactive>).

#### 153 **Construction of disruption mutants $\Delta 02575$ , $\Delta 05540$ and $\Delta 42780$**

154 To construct the *SLINC\_RS02575*, *SLINC\_RS05540* and *SLINC\_RS42780* disruption strains ( $\Delta 02575$ ,  $\Delta 05540$  and  
155  $\Delta 42780$ ), the same CRISPR/Cas9-based genetic editing method was carried out as construction of  $\Delta lmbU$  with some

156 modification in construction of disruption plasmids. Take construction of  $\Delta 02575$  for example, upstream and  
157 downstream homologous arms of *SLINC\_RS02575* were amplified by PCR using primer pairs u-02575-F/R and  
158 d-02575-F/R, respectively. Specific sgRNA was added to upstream homologous arm by PCR using the primer pair  
159 sg-02575/u-02575-R. The above two DNA fragments (sgRNA-containing upstream and downstream homologous  
160 arms) were cloned into the *SpeI/HindIII* sites of pKCcas9dO using Super Efficiency Fast Seamless Cloning kits (Do  
161 Gene, China), resulting in disruption plasmid pKCcas9d02575. The primer pair JD-02575-F/R was used to identify  
162 the conjugants selected with nalidixic acid and apramycin, and the primer pair CR1/2 was used to verify the  
163 elimination of the disruption plasmid.

#### 164 **Lincomycin bioassay analysis**

165 Lincomycin bioassay analysis was carried out as described in our previous work (25). FM2 medium (20 g/L lactose,  
166 20 g/L glucose, 10 g/L corn steep liquor, 10 g/L polypeptone, 4 g/L CaCO<sub>3</sub>, pH 7.0) was used for fermentation  
167 cultivation. *Micrococcus luteus* 28001 was used as an indicator strain, and the concentrations of samples were  
168 measured according to the lincomycin standard curves.  
169 Three biological independent experiments were done for the analytical procedures. Error bars indicated means  $\pm$   
170 standard deviations.

#### 171 **RNA extraction and quantitative real-time PCR (qRT-PCR)**

172 The strains were cultured in FM2 medium for 2 days, and then RNA was extracted by the method using TRIzol  
173 (Thermo Fisher Scientific, United States) (33). The trace amount of DNA was removed through incubation with  
174 RNase-free DNase I (TaKaRa, Japan) at 28 °C, and the obtained RNA was analyzed using Nano Drop 2000 (Thermo  
175 Fisher Scientific, United States). 1 g RNA was used to synthesize the cDNA using reverse transcription M-MLV

176 (RNase-free) kits (TaKaRa, Japan). qRT-PCR was performed with SYBR green PCR master mix (ToYoBo, Japan) as  
177 described previously (25). PCR was carried out in triplicate for each sample. The transcriptional level of *hrdB* was  
178 used as a positive internal control to normalize the transcriptional levels of target genes, which were measured by the  
179 threshold cycle ( $2^{-\Delta\Delta CT}$ ) method (38).

## 180 **Results**

### 181 **Screening the potential targets of LmbU from the genome of *S. lincolnensis***

182 Previously, we have identified LmbU as a CSR involved in lincomycin biosynthesis (25), moreover, hundreds of  
183 LmbU homologues exist in or outside the BGCs of antibiotics derived from different actinomycetes (39), suggesting  
184 that LmbU homologues might not only affect antibiotics biosynthesis by regulating synthetic genes as a CSR, but  
185 also participate in other pathways. To explore potential regulatory targets of LmbU in *S. lincolnensis*, a conserved  
186 palindrome sequence 5'-TCGCCGGCGA-3' bound by LmbU was used to scan in the whole-genome of *S.*  
187 *lincolnensis*. A total of 176 conserved sequences were found throughout the genome, among which 54 were located  
188 in the potential regulatory regions (-600 – +100 relative to the putative translational start site, and not located inside  
189 the operon). Whereafter, 14 candidate targets which may be relevant to lincomycin biosynthesis were selected,  
190 including 4 regulators, 5 transporters or resistance related proteins, 2 sigma factors, and 3 other functional proteins  
191 (Table 2).

### 192 **LmbU binds to the promoter regions of 8 target genes directly**

193 In order to investigate whether LmbU can bind to the above 14 targets, EMSAs were carried out with purified  
194 His<sub>6</sub>-LmbU and the DNA probes of candidate targets. The results showed that His<sub>6</sub>-LmbU could obviously bind to

195 the promoter regions of 8 genes in a concentration-dependent manner, but not bind to the promoter regions of other 6  
196 genes (Fig. 1). The deduced products of the 8 target genes were as follows: LAL family transcriptional regulator  
197 (encoded by *SLINC\_RS02575*), AcoR family transcriptional regulator (encoded by *SLINC\_RS05540*), Arac family  
198 transcriptional regulator (encoded by *SLINC\_RS42780*), MFS transporter (encoded by *SLINC\_RS03185*), sugar ABC  
199 transporter permease (encoded by *SLINC\_RS33920*), DHA2 family efflux MFS transporter permease subunit  
200 (encoded by *SLINC\_RS38630*), sigma 70 family RNA polymerase (encoded by *SLINC\_RS34875*) and  
201 methyltransferase domain-containing protein (encoded by *SLINC\_RS05745*). Among these, *SLINC\_RS03185* and  
202 *SLINC\_RS38630* shares 45% identity, and respectively have 36% and 38% identity to LmrA, which is located in the  
203 *lmb* cluster and responsible for lincomycin transportation.

204 Subsequently, to confirm the binding specificity of His<sub>6</sub>-LmbU to the above 8 targets, competition experiments were  
205 introduced into EMSAs. In the presence of 6.4 μM His<sub>6</sub>-LmbU, the retardant bands of all 8 targets were significantly  
206 weakened when 200-fold excesses of unlabeled specific DNA were added, but did not change when 200-fold  
207 excesses of unlabeled nonspecific DNA (a negative probe that can not bind to His<sub>6</sub>-LmbU, Figure S1) were added.

208 These data demonstrated that LmbU can directly and specifically bind to the promoter regions of the above 8 target  
209 genes (Fig. 2), including 3 regulators, 3 transporters, 1 sigma factor and 1 other functional protein. The binding  
210 affinities of LmbU with different probes are diverse. LmbU has the highest binding affinity with the probe  
211 *SLINC\_RS38630p*, while the weakest binding affinity with the probe *SLINC\_RS33920p*. Besides, two retardant  
212 bands were observed when His<sub>6</sub>-LmbU bound to *SLINC\_RS05745p*, indicating the regulatory model of LmbU to this  
213 target may be different from that of the others.

214 As we know, antibiotics biosynthesis is strictly controlled by accurate and sophisticated regulatory networks.

215 Through the above studies, we revealed that three regulatory genes may be regulated by LmbU. Next, our studies  
216 will focus on these three regulatory genes.

217 **LmbU represses the promoters of *SLINC\_RS02575* and *SLINC\_RS05540* and activates the promoter of**  
218 ***SLINC\_RS42780* *in vivo***

219 To investigate the regulation of LmbU to the 3 regulator genes *in vivo*, we firstly constructed a *lmbU* disruption  
220 strain  $\Delta lmbU$  by using a CRISPR/Cas9-based genetic editing method. The data of construction and identification of  
221  $\Delta lmbU$  were shown in Figure S2. Then, the WT and  $\Delta lmbU$  strains were chosen for qRT-PCR assays to analyze the  
222 effects of LmbU on the transcription of the 3 target genes. However, all the transcriptional levels of the 3 genes were  
223 not enough for quantitative analysis (data not shown).

224 Therefore, we performed *xyITE* reporter assays, using the catechol dioxygenase gene (*xyITE*) as a reporter gene. The  
225 reporter plasmids p02575TE, p05540TE and p42780TE, where the *xyITE* gene was under the control of  
226 *SLINC\_RS02575p*, *SLINC\_RS05540p* and *SLINC\_RS42780p* respectively, were introduced into NRRL 2936 and  
227  $\Delta lmbU$ , resulting in reporter strains. As results, enzyme activities of XylITE controlled by *SLINC\_RS02575p* and  
228 *SLINC\_RS05540p* exhibited 7-fold and 6-fold increase in  $\Delta lmbU$  compared to WT, respectively (Fig. 3A and 3B),  
229 suggesting that LmbU represses the promoters of *SLINC\_RS02575* and *SLINC\_RS05540* *in vivo*. In contrast, enzyme  
230 activities of XylITE controlled by *SLINC\_RS42780p* showed 19-fold decrease in  $\Delta lmbU$  compared to WT (Fig. 3C),  
231 suggesting that LmbU activates the promoter of *SLINC\_RS42780* *in vivo*.

232 Subsequently, we will further investigate the influence and mechanism of *SLINC\_RS02575*, *SLINC\_RS05540* and  
233 *SLINC\_RS42780* on lincomycin biosynthesis by means of bioinformatics analysis, gene knockout, lincomycin  
234 bioassay analysis and qRT-PCR.

## 235 **SLINC\_RS02575 negative regulates lincomycin biosynthesis**

236 The gene *SLINC\_RS02575* is 2967 bp, and encodes a protein containing 988 amino acids, which belongs to a large  
237 ATP-binding regulator of the LuxR family (LAL) transcriptional regulator. Sequence alignment showed that  
238 N-terminal of *SLINC\_RS02575* has an AAA+ (ATPases Associated with a wide variety of Activities) domain with  
239 ATPase activity, which contains conserved Walker A motif (A/G-X4-G-K-S/T, X indicates any amino acids) and  
240 Walker B motif (hhhhhDD, h indicates hydrophobic amino acids) (Fig. 4a and 4b). C-terminal of *SLINC\_RS02575*  
241 has a DNA-binding domain (DBD) of the helix-turn-helix (HTH) structure of the LuxR family (Fig. 4a and 4c).  
242 To further investigate the function of *SLINC\_RS02575* in *S. lincolnensis*, we constructed a *SLINC\_RS02575*  
243 disruption strain  $\Delta$ *SLINC\_RS02575*, in which the internal region ranging of *SLINC\_RS02575* was deleted. The  
244 mutant  $\Delta$ *SLINC\_RS02575* was confirmed by PCR using the primer pair JD02575-F/R. PCR products of WT with  
245 intact *SLINC\_RS02575* gene and  $\Delta$ *SLINC\_RS02575* with defective *SLINC\_RS02575* gene were 4.3 kb (Lane 1) and  
246 2.4 kb (Lane 2) respectively. PCR amplification by primer pair CR1/CR2 was used to determine that the disruption  
247 plasmid pKCcas9d02575 was eliminated from the mutant  $\Delta$ *SLINC\_RS02575*. A 2.6 kb band appeared only using  
248 pKCcas9d02575 as template (Lane 6), rather than WT (Lane 4) or  $\Delta$ *SLINC\_RS02575* (Lane 5). Moreover,  
249 sequencing analysis verified that the mutant  $\Delta$ *SLINC\_RS02575* was constructed successfully (Fig. 5a).  
250 Subsequently, the WT and  $\Delta$ *SLINC\_RS02575* strains were cultured in FM2 medium to measure the lincomycin  
251 production. *Micrococcus luteus* 28001 was used as an indicator strain to perform lincomycin bioassays. The results  
252 showed that the yield of lincomycin in  $\Delta$ *SLINC\_RS02575* increased 2.6-fold compared to that in WT (Fig. 5b),  
253 indicating that *SLINC\_RS02575* negatively regulates lincomycin biosynthesis. Furthermore, qRT-PCR analysis was  
254 carried out to assess the influence of *SLINC\_RS02575* on transcription of *lmb* genes. There are 8 putative operons in

255 the lincomycin cluster, and the first gene of each operon was chosen to perform qRT-PCR, except for *lmbK*, which  
256 could not be detected due to the low transcriptional level according to our previous study (25, 33). Compared to WT,  
257 the transcriptional levels of *lmbA*, *lmbD*, *lmbJ*, *lmbV*, *lmbW* and *lmbU* were significantly increased in  
258  $\Delta SLINC\_RS02575$  with fold changes 3.7, 2.0, 1.4, 4.3, 13.0 and 3.3, respectively (Fig. 5c). Similar transcriptional  
259 levels of *lmbC* were observed in WT and  $\Delta SLINC\_RS02575$ , suggesting *lmbC* was not regulated by  
260  $SLINC\_RS02575$ . These data demonstrated that  $SLINC\_RS02575$  can suppress the transcription of *lmbA*, *lmbD*,  
261 *lmbJ*, *lmbV*, *lmbW* and *lmbU*, thereby inhibit lincomycin biosynthesis.

#### 262 **$SLINC\_RS05540$ negative regulates lincomycin biosynthesis**

263 The 1908-bp  $SLINC\_RS05540$  gene encodes an AcoR family transcriptional regulator, which contains 635 amino  
264 acids. A conserved Walker A motif (**GERGTGK**) and a HTH motif were found in the internal and the C-terminal of  
265  $SLINC\_RS05540$  respectively, indicating  $SLINC\_RS05540$  has putative ATP-binding and DNA-binding activities  
266 (Fig. 6a). In addition, the results of structure modeling and sequence alignment showed that the HTH motif of  
267  $SLINC\_RS05540$  contains three  $\alpha$ -helices referred to the template structure of NtrX derived from *Brucella abortus*  
268 (SMTL ID: 5m7n.1,  $\alpha 18$ - $\alpha 20$ ) (40), and the amino acids are conserved in *Streptomyces* (Fig. 6b).

269 Then, a  $SLINC\_RS05540$  disruption strain  $\Delta SLINC\_RS05540$  was constructed using the method as above. PCR  
270 products amplified by the primer pair JD05540-F/R were 3.8 kb and 2.5 kb with WT and  $\Delta SLINC\_RS05540$  as  
271 templates, respectively. A 2.6 kb band appeared only using pKCas9d05540 as template, rather than WT or  
272  $\Delta SLINC\_RS05540$  (Fig. 7a). These data indicated that  $\Delta SLINC\_RS05540$  was constructed successfully.  
273 Subsequently, the WT and  $\Delta SLINC\_RS05540$  strains were cultured in FM2 medium to measure the lincomycin  
274 production. The results of lincomycin bioassays showed that the yield of lincomycin in  $\Delta SLINC\_RS05540$  increased

275 3.1-fold compared to that in WT (Fig. 7b), indicating that SLINC\_RS05540 negatively regulates lincomycin  
276 biosynthesis. qRT-PCR analysis revealed that, compared to WT, the transcriptional levels of *lmbA*, *lmbC*, *lmbD*, *lmbJ*,  
277 *lmbV*, *lmbW* and *lmbU* were significantly increased in  $\Delta$ SLINC\_RS05540 with fold changes 4.9, 1.4, 2.0, 1.9, 7.6,  
278 20.4 and 9.5, respectively (Fig. 7c). These data demonstrated that SLINC\_RS05540 can suppress transcription of  
279 *lmbA*, *lmbC*, *lmbD*, *lmbJ*, *lmbV*, *lmbW* and *lmbU*, thereby inhibit lincomycin biosynthesis.

### 280 **SLINC\_RS42780 negative regulates lincomycin biosynthesis**

281 The 906-bp SLINC\_RS42780 gene encodes a protein containing 301 amino acids, the C-terminal of which contains  
282 an AraC type DBD with putative DNA-binding activity (Fig. 8a). SLINC\_RS42780 belongs to AraC family  
283 transcriptional regulators, which include the famous transcriptional regulator AdpA in *Streptomyces*. It has been  
284 reported that the DBD of AdpA derived from *Streptomyces griseus* contains two HTH motifs, HTH1 ( $\alpha$ 2 and  $\alpha$ 3) and  
285 HTH2 ( $\alpha$ 5 and  $\alpha$ 6) (41). Structure modeling and sequence alignment revealed that the DBD of SLINC\_RS42780  
286 includes similar HTH motifs referred to the template structure of AdpA (SMTL ID: 3w6v.1), and the amino acids are  
287 conserved in *Streptomyces* (Fig. 8b).

288 Then, a SLINC\_RS42780 disruption strain  $\Delta$ SLINC\_RS42780 was constructed using the method as above. PCR  
289 products amplified by the primer pair JD42780-F/R were 2.8 kb and 2.2 kb with WT and  $\Delta$ SLINC\_RS42780 as  
290 templates, respectively. A 2.5 kb band appeared only using pKCcas9d42780 as template, rather than WT or  
291  $\Delta$ SLINC\_RS42780 (Fig. 9a). These data indicated that  $\Delta$ SLINC\_RS42780 was constructed successfully.

292 Subsequently, the WT and  $\Delta$ SLINC\_RS42780 strains were cultured in FM2 medium to measure the lincomycin  
293 production. The results of lincomycin bioassays showed that the yield of lincomycin in  $\Delta$ SLINC\_RS42780 increased  
294 3.2-fold compared to that in WT (Fig. 9b), indicating that SLINC\_RS42780 negatively regulates lincomycin



295 biosynthesis. Furthermore, qRT-PCR analysis demonstrated that, compared to WT, the transcriptional levels of *lmbA*,  
296 *lmbC*, *lmbD*, *lmbV*, *lmbW* and *lmbU* were significantly increased in  $\Delta$ SLINC\_RS42780 with fold changes 4.2, 3.5,  
297 4.1, 4.7, 13.3 and 5.5, respectively (Fig. 9c). The transcriptional levels of *lmbJ* were similar in WT and  
298  $\Delta$ SLINC\_RS42780, suggesting *lmbJ* was not regulated by SLINC\_RS42780. These data demonstrated that  
299 SLINC\_RS42780 can suppress the transcription of *lmbA*, *lmbC*, *lmbD*, *lmbJ*, *lmbV*, *lmbW* and *lmbU*, thereby inhibit  
300 lincomycin biosynthesis.

301 **LmbU and its targets SLINC\_RS02575, SLINC\_RS05540 and SLINC\_RS42780 coexist in many**  
302 **actinomycetes**

303 Previously, we showed that LmbU homologues are widely found in actinomycetes, especially *Streptomyces* (39). It is  
304 very interesting to explore whether the regulatory targets of LmbU (SLINC\_RS02575, SLINC\_RS05540 and  
305 SLINC\_RS42780) are also widely existed in actinomycetes. According to this consideration, we firstly searched the  
306 strains containing both the homologues of LmbU and one target in NCBI database. The results showed that all the  
307 homologues of SLINC\_RS02575, SLINC\_RS05540 and SLINC\_RS42780 appear widely in various *Streptomyces*  
308 species which also contain LmbU homologues. The top 10 strains ranking by the identities of SLINC\_RS02575,  
309 SLINC\_RS05540 or SLINC\_RS42780 were shown in Table S2, S3 or S4. Interestingly, some strains contain more  
310 than one LmbU homologues, such as *Streptomyces resistomycificus* (Table S2), *Streptomyces mirabilis* (Table S3),  
311 *Streptomyces albicerus* (Table S4), and so on. What's more, a SLINC\_RS42780 homologues was found in  
312 *Nonomuraea zaeae*, which belongs to actinomycetes, but not *Streptomyces*, indicating the universality of LmbU and  
313 its regulatory targets.

314 In addition, the strains containing all the homologues of LmbU and the three targets (defined by identities more than

315 30%) were searched in NCBI database. The top 10 strains ranking by the identities of LmbU were shown in Table 3.  
316 The data revealed that all the four proteins are widely found in actinomycetes, including a non-*Streptomyces*  
317 *Kutzneria buriramensis*, indicating that LmbU homologues may also regulate these targets in other actinomycetes.  
318 Subsequently, we analyzed the promoter regions of the genes encoding the homologues of the three targets in the 10  
319 strains. Surprisingly, only the promoter regions of the genes encoding SLINC\_RS05540 homologue from  
320 *Streptomyces xylophagus*, and SLINC\_RS42780 homologue from *Streptomyces albicerus* contain the 10-bp  
321 conserved palindromic sequence 5'-TCGCCGGCGA-3' (Table S5). These data demonstrated that the regulatory  
322 mechanisms of LmbU homologues in different strains have similarities as well as differences.

323

## 324 **Discussion**

325 LmbU, a CSR of lincomycin BGC, has been shown to directly or indirectly regulate the structural genes within the  
326 *lmb* cluster (25). In addition, we have demonstrated that LmbU homologues are widely found in actinomycetes, and  
327 their positions on the chromosome are not limited to the antibiotic BGCs (25, 39). Based on this, we screened and  
328 identified the targets of LmbU which are located outside the *lmb* cluster, and showed the effect of these targets on  
329 production of lincomycin (Fig. 10). LmbU promotes lincomycin biosynthesis through regulating transcription of the  
330 *lmb* genes as well as three target genes outside the *lmb* cluster. In addition, the three target genes,  $\Delta$ SLINC\_RS02575,  
331  $\Delta$ SLINC\_RS05540 and  $\Delta$ SLINC\_RS42780, have been found negatively regulated lincomycin biosynthesis via  
332 regulating transcription of the *lmb* genes including *lmbU*. However, it is unknown whether the three regulators

333 directly regulate the *lmb* genes by binding to their promoters. This study can further illuminate the regulatory  
334 network of lincomycin biosynthesis, and will bring light to the functional analysis of LmbU family regulators.  
335 Cross-regulation of CSRs among disparate antibiotic biosynthetic pathways has been widely studied in *Streptomyces*  
336 (14-16, 20). However, it is rarely reported that CSRs regulate the targets outside the BGCs. Here, we found that the  
337 DBS of LmbU are widely distributed in the genome of *S. lincolnensis*, and 54 DBSs were located in the potential  
338 regulatory regions of genes, suggesting that LmbU is likely to function as a pleiotropic regulator and regulate more  
339 targets except for the *lmb* genes. We chose 14 targets which may be relevant to lincomycin biosynthesis, and carried  
340 out EMSAs. The results showed that LmbU can bind to 8 out of the 14 targets (Fig. 1), which encode regulators,  
341 transporters, sigma factors and other enzymes, indicating LmbU may function as a pleiotropic regulator.  
342 Though the sequence of DBS of LmbU within each target is perfectly matched, the binding affinity is not similar,  
343 indicating that the flanking sequence of DBS or the structure of the DNA may be also important for DNA-binding of  
344 LmbU. As reported, two ways have been found to be involved in DNA sequences recognition of proteins (42). One  
345 way is directly based on contacts of amino acids and bases, and the flanking sequences are also important (43). For  
346 example, the first and second flanking positions 5' to the consensus DBS play important roles in DNA-binding  
347 affinity for E12 homodimer and E12-TAL1 heterodimer (44). The other way is indirectly mediated by the  
348 conformation of the DNA (45-47). Thus, the structures of DNA, including bendability, stability, groove shape,  
349 flexibility and so on, rather than the simple sequence are more appropriate to determine the DNA-binding affinities  
350 of proteins.  
351 Previously, we have showed that LmbU promotes the production of lincomycin by activating the transcription of *lmb*  
352 genes (25). Here, we demonstrated that LmbU inhibited the transcription of *SLINC\_RS02575* and *SLINC\_RS05540*,

353 which negatively regulate the production of lincomycin, suggesting that LmbU affect the production of lincomycin  
354 not only by activating the *lmb* genes, but also by suppressing the genes against lincomycin biosynthesis. On the  
355 contrary, LmbU activates the transcription of *SLINC\_RS42780*, which negatively regulates the production of  
356 lincomycin. This may be conducive to maintain the level of lincomycin within a certain range *in vivo*.  
357 *SLINC\_RS02575* belongs to LAL family transcriptional regulator, which has both ATPase activity and DNA-binding  
358 activity. LAL family regulators generally function as CSRs and directly regulate antibiotics biosynthesis, such as  
359 SlnR for salinomycin biosynthesis in *S. albus* (48), RapH for rapamycin biosynthesis in *Streptomyces hygroscopicus*  
360 (49), and MilR for milbemycin biosynthesis in *Streptomyces bingchengensis* (50). *SLINC\_RS05540* belongs to  
361 AcoR family transcriptional regulator which contains an N-terminal GAF domain for signal sensing and ligand  
362 binding, a central AAA+ domain with ATPase activity, and a C-terminal DBD domain with a HTH motif associated  
363 with DNA-binding (51). AcoR has been well studied in *Bacillus subtilis*, and it functions as a  $\sigma^{54}$ -dependent  
364 transcriptional activator (52) *SLINC\_RS05540* contains the C-terminal HTH motif and the central defective AAA+  
365 domain, which includes the walker A motif, but lack of the walker B motif. In addition, the N-terminal of  
366 *SLINC\_RS05540* does not contain the GAF domain. Thus, we speculated that the functions of *SLINC\_RS05540* and  
367 AcoR may have commonality as well as diversity. *SLINC\_RS42780* belongs to AraC family transcriptional regulator,  
368 the members of which have been found in a variety of bacterial species and regulate the transcription of genes  
369 participated in carbon sources, stress responses, and so on (53). AdpA, a best studied member of AraC family,  
370 widely exists in *Streptomyces* and takes part in morphological differentiation and secondary metabolism (33). These  
371 data revealed that the regulatory network of LmbU on lincomycin biosynthesis is complex and accurate. In addition,  
372 LmbU can bind to the promoter regions of *SLINC\_RS03185* (encode a MFS transporter), *SLINC\_RS33920* (encode a

373 sugar ABC transporter permease), *SLINC\_RS38630* (encode a DHA2 family efflux MFS transporter permease  
374 subunit), *SLINC\_RS34875* (encode a sigma 70 family RNA polymerase), and *SLINC\_RS05745* (encode a  
375 methyltransferase domain-containing protein). The studies about the regulatory mechanisms of LmbU to these  
376 targets and the effects of these target genes on lincomycin biosynthesis are ongoing.  
377 It is worth noting that LmbU homologues and *SLINC\_RS02575*, *SLINC\_RS05540*, *SLINC\_RS42780* homologues  
378 are all widely found in actinomycetes. After analysis of the 10 strains containing all the four proteins, we found that  
379 the promoter regions of only two genes contain the 10-bp conserved palindromic sequence 5'-TCGCCGGCGA-3',  
380 while the locations of which in the two strains are different from that in *S. lincolnensis* (Table S5). These data  
381 demonstrated that the regulatory mechanisms of LmbU homologues are diverse in different strains, and our findings  
382 provide a basic study on the research of LmbU homologues.

383

384 **Acknowledgements** This work was supported by the National Natural Science Foundation of China (NSFS)  
385 (31900059), and the China Postdoctoral Science Foundation (2019M650079).

386 **Compliance with ethical standards**

387 **Conflict of interest** The authors declare that they have no conflict of interest.

388 **Ethical approval** This article does not contain any studies with human participants or animals performed by any of  
389 the authors.

390

391 **References**

- 392 1. van Wezel GP, McDowall KJ. 2011. The regulation of the secondary metabolism of *Streptomyces*: new  
393 links and experimental advances. *Nat Prod Rep* 28:1311-1333.
- 394 2. Hamid ME, Reitz T, Joseph MRP, Hommel K, Mahgoub A, Elhassan MM, Buscot F, Tarkka M. 2020.  
395 Diversity and geographic distribution of soil streptomycetes with antagonistic potential against  
396 actinomycetoma-causing *Streptomyces sudanensis* in Sudan and South Sudan. *BMC Microbiol* 20:33.
- 397 3. Olano C, Mendez C, Salas JA. 2009. Antitumor compounds from actinomycetes: from gene clusters to new  
398 derivatives by combinatorial biosynthesis. *Nat Prod Rep* 26:628-660.
- 399 4. Ward AC, Allenby NE. 2018. Genome mining for the search and discovery of bioactive compounds: the  
400 *Streptomyces* paradigm. *FEMS Microbiol Lett* 365.
- 401 5. Carroll AR, Copp BR, Davis RA, Keyzers RA, Prinsep MR. 2020. Marine natural products. *Nat Prod Rep*  
402 37:175-223.
- 403 6. Xia H, Zhan X, Mao XM, Li YQ. 2020. The regulatory cascades of antibiotic production in *Streptomyces*.  
404 *World journal of microbiology & biotechnology* 36:13.
- 405 7. Kong D, Wang X, Nie J, Niu G. 2019. Regulation of Antibiotic Production by Signaling Molecules in  
406 *Streptomyces*. *Front Microbiol* 10:2927.
- 407 8. Li J, Li Y, Niu G, Guo H, Qiu Y, Lin Z, Liu W, Tan H. 2018. NosP-Regulated Nosiheptide Production  
408 Responds to Both Peptidyl and Small-Molecule Ligands Derived from the Precursor Peptide. *Cell chemical*  
409 *biology* 25:143-153 e144.
- 410 9. Gou L, Han T, Wang X, Ge J, Liu W, Hu F, Wang Z. 2017. A Novel TetR Family Transcriptional Regulator,  
411 CalR3, Negatively Controls Calcimycin Biosynthesis in *Streptomyces chartreusis* NRRL 3882. *Front*  
412 *Microbiol* 8:2371.
- 413 10. Liu G, Chater KF, Chandra G, Niu G, Tan H. 2013. Molecular regulation of antibiotic biosynthesis in  
414 streptomycetes. *Microbiol Mol Biol Rev* 77:112-143.
- 415 11. Xia H, Li X, Li Z, Zhan X, Mao X, Li Y. 2020. The Application of Regulatory Cascades in *Streptomyces*:  
416 Yield Enhancement and Metabolite Mining. *Front Microbiol* 11:406.
- 417 12. Higo A, Hara H, Horinouchi S, Ohnishi Y. 2012. Genome-wide distribution of AdpA, a global regulator for  
418 secondary metabolism and morphological differentiation in *Streptomyces*, revealed the extent and  
419 complexity of the AdpA regulatory network. *DNA Res* 19:259-273.
- 420 13. Zhang Y, Pan G, Zou Z, Fan K, Yang K, Tan H. 2013. JadR\*-mediated feed-forward regulation of cofactor  
421 supply in jadomycin biosynthesis. *Mol Microbiol* 90:884-897.
- 422 14. McLean TC, Hoskisson PA, Seipke RF. 2016. Coordinate Regulation of Antimycin and Candicidin  
423 Biosynthesis. *mSphere* 1.
- 424 15. Jiang M, Yin M, Wu S, Han X, Ji K, Wen M, Lu T. 2017. GdmRIII, a TetR Family Transcriptional Regulator,  
425 Controls Geldanamycin and Elaiophylin Biosynthesis in *Streptomyces autolyticus* CGMCC0516. *Sci Rep*  
426 7:4803.
- 427 16. Xu G, Wang J, Wang L, Tian X, Yang H, Fan K, Yang K, Tan H. 2010. "Pseudo" gamma-butyrolactone  
428 receptors respond to antibiotic signals to coordinate antibiotic biosynthesis. *J Biol Chem* 285:27440-27448.

- 429 17. Wang L, Tian X, Wang J, Yang H, Fan K, Xu G, Yang K, Tan H. 2009. Autoregulation of antibiotic  
430 biosynthesis by binding of the end product to an atypical response regulator. *Proc Natl Acad Sci U S A*  
431 106:8617-8622.
- 432 18. Santamarta I, Rodriguez-Garcia A, Perez-Redondo R, Martin JF, Liras P. 2002. CcaR is an autoregulatory  
433 protein that binds to the *ccaR* and *cefD-cmcl* promoters of the cephamycin C-clavulanic acid cluster in  
434 *Streptomyces clavuligerus*. *J Bacteriol* 184:3106-3113.
- 435 19. Huang J, Shi J, Molle V, Sohlberg B, Weaver D, Bibb MJ, Karoonuthaisiri N, Lih CJ, Kao CM, Buttner MJ,  
436 Cohen SN. 2005. Cross-regulation among disparate antibiotic biosynthetic pathways of *Streptomyces*  
437 *coelicolor*. *Mol Microbiol* 58:1276-1287.
- 438 20. Guo J, Zhao J, Li L, Chen Z, Wen Y, Li J. 2010. The pathway-specific regulator AveR from *Streptomyces*  
439 *avermitilis* positively regulates avermectin production while it negatively affects oligomycin biosynthesis.  
440 *Mol Genet Genomics* 283:123-133.
- 441 21. Li C, He H, Wang J, Liu H, Wang H, Zhu Y, Wang X, Zhang Y, Xiang W. 2019. Characterization of a  
442 LAL-type regulator NemR in nemadectin biosynthesis and its application for increasing nemadectin  
443 production in *Streptomyces cyaneogriseus*. *Science China. Life sciences* 62:394-405.
- 444 22. Spizek J, Rezanka T. 2004. Lincomycin, cultivation of producing strains and biosynthesis. *Appl Microbiol*  
445 *Biotechnol* 63:510-519.
- 446 23. Koběřská M, Kopecký J, Olšovská M, Jelínková M, Ulanova D, Man P, Flieger M, J J. 2008. Sequence  
447 analysis and heterologous expression of the lincomycin biosynthetic cluster of the type strain *Streptomyces*  
448 *lincolnensis* ATCC 25466. *Folia Microbiol (Praha)* 53:395-401.
- 449 24. Zhang HZ, Schmidt H, Piepersberg W. 1992. Molecular cloning and characterization of two  
450 lincomycin-resistance genes, *lmrA* and *lmrB*, from *Streptomyces lincolnensis* 78-11. *Mol Microbiol*  
451 6:2147-2157.
- 452 25. Hou B, Lin Y, Wu H, Guo M, Petkovic H, Tao L, Zhu X, Ye J, Zhang H. 2018. The Novel Transcriptional  
453 Regulator LmbU Promotes Lincomycin Biosynthesis through Regulating Expression of Its Target Genes in  
454 *Streptomyces lincolnensis*. *J Bacteriol* 200.
- 455 26. Jiraskova P, Gazak R, Kamenik Z, Steiningerova L, Najmanova L, Kadlcik S, Novotna J, Kuzma M, Janata  
456 J. 2016. New Concept of the Biosynthesis of 4-Alkyl-L-Proline Precursors of Lincomycin, Hormaomycin,  
457 and Pyrrolobenzodiazepines: Could a gamma-Glutamyltransferase Cleave the C-C Bond? *Front Microbiol*  
458 7:276.
- 459 27. Zhong G, Zhao Q, Zhang Q, Liu W. 2017. 4-alkyl-L-(Dehydro)proline biosynthesis in actinobacteria  
460 involves N-terminal nucleophile-hydrolase activity of gamma-glutamyltranspeptidase homolog for C-C  
461 bond cleavage. *Nat Commun* 8:16109.
- 462 28. Sasaki E, Lin CI, Lin KY, Liu HW. 2012. Construction of the octose 8-phosphate intermediate in  
463 lincomycin A biosynthesis: characterization of the reactions catalyzed by LmbR and LmbN. *J Am Chem*  
464 *Soc* 134:17432-17435.
- 465 29. Lin CI, Sasaki E, Zhong A, Liu HW. 2014. *In vitro* characterization of LmbK and LmbO: identification of  
466 GDP-D-erythro-alpha-D-gluco-octose as a key intermediate in lincomycin A biosynthesis. *J Am Chem Soc*  
467 136:906-909.
- 468 30. Zhao Q, Wang M, Xu D, Zhang Q, Liu W. 2015. Metabolic coupling of two small-molecule thiols programs

- 469 the biosynthesis of lincomycin A. *Nature* 518:115-119.
- 470 31. Wang M, Zhao Q, Zhang Q, Liu W. 2016. Differences in PLP-Dependent Cysteinylation Processing Lead to  
471 Diverse S-Functionalization of Lincosamide Antibiotics. *J Am Chem Soc* 138:6348-6351.
- 472 32. Hou B, Tao L, Zhu X, Wu W, Guo M, Ye J, Wu H, Zhang H. 2018. Global regulator BldA regulates  
473 morphological differentiation and lincomycin production in *Streptomyces lincolnensis*. *Appl Microbiol*  
474 *Biotechnol* 102:4101-4115.
- 475 33. Kang Y, Wang Y, Hou B, Wang R, Ye J, Zhu X, Wu H, Zhang H. 2019. AdpA<sub>lin</sub>, a Pleiotropic  
476 Transcriptional Regulator, Is Involved in the Cascade Regulation of Lincomycin Biosynthesis in  
477 *Streptomyces lincolnensis*. *Front Microbiol* 10:2428.
- 478 34. Xu Y, Ke M, Li J, Tang Y, Wang N, Tan G, Wang Y, Liu R, Bai L, Zhang L, Wu H, Zhang B. 2019.  
479 TetR-Type Regulator SLCG\_2919 Is a Negative Regulator of Lincomycin Biosynthesis in *Streptomyces*  
480 *lincolnensis*. *Appl Environ Microbiol* 85.
- 481 35. Li J, Wang N, Tang Y, Cai X, Xu Y, Liu R, Wu H, Zhang B. 2019. Developmental regulator BldD directly  
482 regulates lincomycin biosynthesis in *Streptomyces lincolnensis*. *Biochem Biophys Res Commun*  
483 518:548-553.
- 484 36. Xu Y, Tang Y, Wang N, Liu J, Cai X, Cai H, Li J, Tan G, Liu R, Bai L, Zhang L, Wu H, Zhang B. 2020.  
485 Transcriptional regulation of a leucine-responsive regulatory protein for directly controlling lincomycin  
486 biosynthesis in *Streptomyces lincolnensis*. *Appl Microbiol Biotechnol* 104:2575-2587.
- 487 37. Wang R, Kong F, Wu H, Hou B, Kang Y, Cao Y, Duan S, Ye J, Zhang H. 2020. Complete genome sequence  
488 of high-yield strain *S. lincolnensis* B48 and identification of crucial mutations contributing to lincomycin  
489 overproduction. *Synthetic and systems biotechnology* 5:37-48.
- 490 38. Livak KJ, Schmittgen TD. 2001. Analysis of relative gene expression data using real-time quantitative PCR  
491 and the 2<sup>-</sup>(Delta Delta C(T)) Method. *Methods* 25:402-408.
- 492 39. Hou B, Zhu X, Kang Y, Wang R, Wu H, Ye J, Zhang H. 2019. LmbU, a Cluster-Situated Regulator for  
493 Lincomycin, Consists of a DNA-Binding Domain, an Auto-Inhibitory Domain, and Forms Homodimer.  
494 *Front Microbiol* 10:989.
- 495 40. Fernandez I, Cornaciu I, Carrica MD, Uchikawa E, Hoffmann G, Sieira R, Marquez JA, Goldbaum FA.  
496 2017. Three-Dimensional Structure of Full-Length NtrX, an Unusual Member of the NtrC Family of  
497 Response Regulators. *J Mol Biol* 429:1192-1212.
- 498 41. Yao MD, Ohtsuka J, Nagata K, Miyazono K, Zhi Y, Ohnishi Y, Tanokura M. 2013. Complex structure of the  
499 DNA-binding domain of AdpA, the global transcription factor in *Streptomyces griseus*, and a target duplex  
500 DNA reveals the structural basis of its tolerant DNA sequence specificity. *J Biol Chem* 288:31019-31029.
- 501 42. Rohs R, West SM, Sosinsky A, Liu P, Mann RS, Honig B. 2009. The role of DNA shape in protein-DNA  
502 recognition. *Nature* 461:1248-1253.
- 503 43. Gordan R, Shen N, Dror I, Zhou T, Horton J, Rohs R, Bulyk ML. 2013. Genomic regions flanking E-box  
504 binding sites influence DNA binding specificity of bHLH transcription factors through DNA shape. *Cell*  
505 *reports* 3:1093-1104.
- 506 44. Beltran AC, Dawson PE, Gottesfeld JM. 2005. Role of DNA sequence in the binding specificity of synthetic  
507 basic-helix-loop-helix domains. *Chembiochem* 6:104-113.
- 508 45. Fujii S, Kono H, Takenaka S, Go N, Sarai A. 2007. Sequence-dependent DNA deformability studied using



- 509 molecular dynamics simulations. *Nucleic Acids Res* 35:6063-6074.
- 510 46. Rube HT, Rastogi C, Kribelbauer JF, Bussemaker HJ. 2018. A unified approach for quantifying and  
511 interpreting DNA shape readout by transcription factors. *Molecular systems biology* 14:e7902.
- 512 47. Bansal M, Kumar A, Yella VR. 2014. Role of DNA sequence based structural features of promoters in  
513 transcription initiation and gene expression. *Current opinion in structural biology* 25:77-85.
- 514 48. Zhu Z, Li H, Yu P, Guo Y, Luo S, Chen Z, Mao X, Guan W, Li Y. 2017. SlnR is a positive pathway-specific  
515 regulator for salinomycin biosynthesis in *Streptomyces albus*. *Appl Microbiol Biotechnol* 101:1547-1557.
- 516 49. Kuscer E, Coates N, Challis I, Gregory M, Wilkinson B, Sheridan R, Petkovic H. 2007. Roles of rapH and  
517 rapG in positive regulation of rapamycin biosynthesis in *Streptomyces hygroscopicus*. *J Bacteriol*  
518 189:4756-4763.
- 519 50. Zhang Y, He H, Liu H, Wang H, Wang X, Xiang W. 2016. Characterization of a pathway-specific activator  
520 of milbemycin biosynthesis and improved milbemycin production by its overexpression in *Streptomyces*  
521 *bingchenggensis*. *Microb Cell Fact* 15:152.
- 522 51. Peng Q, Zhao X, Wen J, Huang M, Zhang J, Song F. 2020. Transcription in the acetoin catabolic pathway is  
523 regulated by AcoR and CcpA in *Bacillus thuringiensis*. *Microbiol Res* 235:126438.
- 524 52. Ali NO, Bignon J, Rapoport G, Debarbouille M. 2001. Regulation of the acetoin catabolic pathway is  
525 controlled by sigma L in *Bacillus subtilis*. *J Bacteriol* 183:2497-2504.
- 526 53. Romero-Rodriguez A, Robledo-Casados I, Sanchez S. 2015. An overview on transcriptional regulators in  
527 *Streptomyces*. *Biochim Biophys Acta* 1849:1017-1039.
- 528 54. Huang H, Zheng G, Jiang W, Hu H, Lu Y. 2015. One-step high-efficiency CRISPR/Cas9-mediated genome  
529 editing in *Streptomyces*. *Acta biochimica et biophysica Sinica* 47:231-243.
- 530 55. Bierman M, Logan R, O'Brien K, Seno ET, Rao RN, Schoner BE. 1992. Plasmid cloning vectors for the  
531 conjugal transfer of DNA from *Escherichia coli* to *Streptomyces* spp. *Gene* 116:43-49.

532

533 **Figure legends**

534 **Figure 1** Identification of the binding activities of LmbU to the putative targets. Biotin-labeled probes (5 ng) were  
535 incubated with His<sub>6</sub>-LmbU of increasing concentrations (0, 3.2, 6.4 and 9.6 μM). The free probes and DNA-protein  
536 complexes are indicated by filled triangles and hollow triangles respectively.

537 **Figure 2** EMSAs of LmbU with promoter regions of target genes. Biotin-labeled probes (5 ng) were incubated  
538 with His<sub>6</sub>-LmbU of increasing concentrations (0, 6.4 and 9.6 μM). The free probes and DNA-protein complexes are  
539 indicated by filled triangles and hollow triangles respectively. 200-fold excess of specific (S) or nonspecific (N)  
540 unlabeled probes were used as competitors of the labeled probes.

541 **Figure3** Catechol dioxygenase activity assays of WT and  $\Delta$ *lmbU* with corresponding reporter plasmids. The results  
542 were achieved from three independent experiments. \*\*,  $P < 0.01$ ; \*\*\*,  $P < 0.001$ .

543 **Figure 4** Functional domains and sequence alignment of SLINC\_RS02575. **A** Predicted functional domains of  
544 SLINC\_RS02575. AAA<sup>+</sup>: ATPases Associated with a wide variety of Activities; HTH: helix-turn-helix motif of the  
545 LuxR family for DNA binding. **B** Alignment of the AAA domain of SLINC\_RS02575 with related proteins. **C**  
546 Comparison of the HTH domain of SLINC\_RS02575 with that of other proteins. 1, SLINC\_RS02575 from *S.*  
547 *lincolnensis* (WP\_067426176.1); 2, AveR from *Streptomyces avermitilis* (BAA84600.1); 3, FkbN from *Streptomyces*  
548 *tsukubensis* (TAI41675.1); 4, GdmRI from *Streptomyces hygroscopicus* (ABI93791.1) 5, GdmRII from *Streptomyces*  
549 *hygroscopicus* (ABI93788.1); 6, PikD from *Streptomyces venezuelae* (AAC68887.1); 7, RapH from *Streptomyces*  
550 *hygroscopicus* (AAC38065.1); 8, SalRI from *Streptomyces albus* (ABG02267.1); 9, TtmRI from *Streptomyces*  
551 *ahygroscopicus* subsp. *wuzhouensis* (AFW98290.1); 10, TtmRII from *Streptomyces ahygroscopicus* subsp.  
552 *wuzhouensis* (AFW98288.1). The conserved amino acids of Walker A and Walker B are indicated by red asterisk.

553 **Figure 5** SLINC\_RS02575 suppresses lincomycin biosynthesis. **A** Identification of  $\Delta$ SLINC\_RS02575 by PCR and  
554 sequencing. Lane M indicated the DNA molecular weight marker. Lanes 1, 2 and 3 indicated PCR products  
555 amplified by primer pair JD02575F/R. Lanes 4, 5 and 6 indicated PCR products amplified by primer pair CR1/CR2.  
556 1 and 4, WT; 2 and 5,  $\Delta$ SLINC\_RS02575; 3 and 6, pKCCas9d02575. **B** Effect of SLINC\_RS02575 on lincomycin  
557 production. **C** Transcriptional analysis of lincomycin biosynthetic genes in WT and  $\Delta$ SLINC\_RS02575. The relative  
558 expression was normalized using internal reference gene *hrdB*. The transcriptional level of each gene in WT was set  
559 to 1.0. \*\*,  $P < 0.01$ ; \*\*\*,  $P < 0.001$ .

560 **Figure 6** Functional domains and sequence alignment of SLINC\_RS05540. **A** Predicted functional domains of  
561 SLINC\_RS02575. **B** Alignment of the HTH motif of SLINC\_RS02575 with that of related proteins. 5m7n.1, the  
562 template used for structure modeling of SLINC\_RS02575 in SWISS-MODEL. 1, SLINC\_RS05540 from *S.*  
563 *lincolnensis* (WP\_079164420.1); 2, *Streptomyces aurantiogriseu* (WP\_189940635.1); 3, *Streptomyces fulvoviolaceus*  
564 (WP\_078655870.1); 4, *Streptomyces dysideae* (WP\_079085070.1); 5, *Streptomyces scabiei* (WP\_037704052.1); 6,  
565 *Streptomyces bluensis* (GGZ64430). The conserved amino acids of Walker A are indicated by red asterisk.

566 **Figure 7** SLINC\_RS05540 suppresses lincomycin biosynthesis. **A** Identification of  $\Delta$ SLINC\_RS05540 by PCR and  
567 sequencing. Lane M indicated the DNA molecular weight marker. Lanes 1, 2 and 3 indicated PCR products  
568 amplified by primer pair JD05540F/R. Lanes 4, 5 and 6 indicated PCR products amplified by primer pair CR1/CR2.  
569 1 and 4, WT; 2 and 5,  $\Delta$ SLINC\_RS05540; 3 and 6, pKCCas9d05540. **B** Effect of SLINC\_RS05540 on lincomycin  
570 production. **C** Transcriptional analysis of lincomycin biosynthetic genes in WT and  $\Delta$ SLINC\_RS05540. The relative  
571 expression was normalized using internal reference gene *hrdB*. The transcriptional level of each gene in WT was set  
572 to 1.0. \*,  $P < 0.05$ ; \*\*\*,  $P < 0.001$ .

573 **Figure 8** Functional domains and sequence alignment of SLINC\_RS42780. **A** Predicted functional domains of  
574 SLINC\_RS42780. **B** Alignment of the DBD domains of SLINC\_RS42780 with related proteins. 3w6v.1, the  
575 template used for structure modeling of SLINC\_RS42780 in SWISS-MODEL. 1, SLINC\_RS42780 from *S.*  
576 *lincolnensis* (WP\_067443797.1); 2, *Streptomyces albicerus* (WP\_151477398.1); 3, *Streptomyces albiflavescens*  
577 (WP\_189192684.1); 4, *Streptomyces canus* (WP\_059211104.1); 5, *Streptomyces davaonensis* (WP\_015663102.1); 6,  
578 *Streptomyces scabichelini* (WP\_165261112.1).

579 **Figure 9** SLINC\_RS42780 suppresses lincomycin biosynthesis. **A** Identification of  $\Delta$ SLINC\_RS42780 by PCR and  
580 sequencing. Lane M indicated the DNA molecular weight marker. Lanes 1, 2 and 3 indicated PCR products  
581 amplified by primer pair JD42780F/R. Lanes 4, 5 and 6 indicated PCR products amplified by primer pair CR1/CR2.  
582 1 and 4, WT; 2 and 5,  $\Delta$ SLINC\_RS42780; 3 and 6, pKCCas9d42780. **B** Effect of SLINC\_RS42780 on lincomycin  
583 production. **C** Transcriptional analysis of lincomycin biosynthetic genes in WT and  $\Delta$ SLINC\_RS42780. The relative  
584 expression was normalized using internal reference gene *hrdB*. The transcriptional level of each gene in WT was set  
585 to 1.0. \*,  $P < 0.05$ ; \*\*,  $P < 0.01$ ; \*\*\*,  $P < 0.001$ .

586 **Figure 10** Proposed model of LmbU mediated regulation network to lincomycin biosynthesis. The locations of the  
587 *lmb* cluster and the three target genes on the chromosome were indicated. The arrows indicated activation, and the  
588 vertical virgules indicated inhibition. The solid lines indicated direct action, the dotted lines indicated unknown  
589 mechanisms.

590

591

592

593 **Table 1** Strains and plasmids

| Strains or plasmids     | Description                                                                                             | Source or reference |
|-------------------------|---------------------------------------------------------------------------------------------------------|---------------------|
| <b>Strains</b>          |                                                                                                         |                     |
| <i>E. coli</i>          |                                                                                                         |                     |
| JM83                    | F', ara, $\Delta(lac-pro AB)$ , <i>rpsL</i> , (Str <sup>r</sup> ), $\Phi 80$ , <i>lacZ</i> $\Delta$ M15 | (25)                |
| ET12567/pUZ8002         | <i>dam-13::Tn9 dcm-6 hsdM</i> ; containing the non-transmissible RP4 derivative plasmid pUZ8002         | (25)                |
| S17-1                   | <i>recA</i> , <i>pro</i> , <i>hsdR</i> , RP4-2-Tc::Mu-Km::Tn7                                           | (37)                |
| <i>S. lincolnensis</i>  |                                                                                                         |                     |
| NRRL 2936               | Wild-type (WT), lincomycin producer                                                                     | NRRL, USA           |
| $\Delta lmbU$           | NRRL 2936 with in-frame deletion of <i>lmbU</i>                                                         | This study          |
| WT/p02575TE             | NRRL 2936 attB $\Phi$ C31::p02575TE                                                                     | This study          |
| $\Delta lmbU$ /p02575TE | $\Delta lmbU$ attB $\Phi$ C31::p02575TE                                                                 | This study          |
| WT/p05540TE             | NRRL 2936 attB $\Phi$ C31::p05540TE                                                                     | This study          |
| $\Delta lmbU$ /p05540TE | $\Delta lmbU$ attB $\Phi$ C31::p05540TE                                                                 | This study          |
| WT/p42780TE             | NRRL 2936 attB $\Phi$ C31::p42780TE                                                                     | This study          |
| $\Delta lmbU$ /p42780TE | $\Delta lmbU$ attB $\Phi$ C31::p42780TE                                                                 | This study          |
| $\Delta SLINC\_RS02575$ | NRRL 2936 with in-frame deletion of <i>SLINC_RS02575</i>                                                | This study          |
| $\Delta SLINC\_RS05540$ | NRRL 2936 with in-frame deletion of <i>SLINC_RS05540</i>                                                | This study          |

|                        |                                                                                                               |            |
|------------------------|---------------------------------------------------------------------------------------------------------------|------------|
| $\Delta$ SLINC_RS42780 | NRRL 2936 with in-frame deletion of SLINC_RS42780                                                             | This study |
| <b>Plasmids</b>        |                                                                                                               |            |
| pLU-1                  | <i>lmbU</i> cloned in <i>NdeI/EcoRI</i> sites of pET-28a (+), for LmbU expression                             | (25)       |
| pKCCas9dO              | <i>actII-orf4</i> -specific guide-RNA, homologous arms flanking <i>actII-orf4</i> ,<br><i>aac(3)IV</i> , pSG5 | (54)       |
| pKCCas9dlmbU           | <i>lmbU</i> -specific guide-RNA, homologous arms flanking <i>lmbU</i> , <i>aac(3)IV</i> ,<br>pSG5             | This study |
| pATE152                | pSET152 derivative carrying <i>xylTE</i> gene under <i>lmbAp</i> promoter                                     | (39)       |
| pSET152                | Integrative vector based on $\Phi$ C31 integrase                                                              | (55)       |
| p02575TE               | pSET152 carrying <i>xylTE</i> gene under the control of SLINC_RS02575p                                        | This study |
| p05540TE               | pSET152 carrying <i>xylTE</i> gene under the control of SLINC_RS05540p                                        | This study |
| p42780TE               | pSET152 carrying <i>xylTE</i> gene under the control of SLINC_RS42780p                                        | This study |
| pKCCas9d02575          | SLINC_RS02575-specific guide-RNA, homologous arms flanking<br>SLINC_RS02575, <i>aac(3)IV</i> , pSG5           | This study |
| pKCCas9d05540          | SLINC_RS05540-specific guide-RNA, homologous arms flanking<br>SLINC_RS05540, <i>aac(3)IV</i> , pSG5           | This study |
| pKCCas9d42780          | SLINC_RS42780-specific guide-RNA, homologous arms flanking<br>SLINC_RS42780, <i>aac(3)IV</i> , pSG5           | This study |

594

595

596 **Table 2** Candidate target genes of LmbU

| genes                                             | products               | Putative function                                   | Position of putative LmbU site to TRSS <sup>a</sup> |
|---------------------------------------------------|------------------------|-----------------------------------------------------|-----------------------------------------------------|
| <b>regulator</b>                                  |                        |                                                     |                                                     |
| <i>SLINC_RS02575</i>                              | WP_067426176.1, 988 aa | LAL family transcriptional regulator                | -316 ~ -307                                         |
| <i>SLINC_RS05540</i>                              | WP_079164420.1, 635 aa | AcoR family transcriptional regulator               | -281 ~ -272                                         |
| <i>SLINC_RS23905</i>                              | WP_067445653.1, 186 aa | TetR family transcriptional regulator               | +89 ~ +98                                           |
| <i>SLINC_RS42780</i>                              | WP_067443797.1, 301 aa | AraC family transcriptional regulator               | -365 ~ -356                                         |
| <b>transporter or resistance related proteins</b> |                        |                                                     |                                                     |
| <i>SLINC_RS03185</i>                              | WP_067426389.1, 510 aa | MFS transporter                                     | -172 ~ -163                                         |
| <i>SLINC_RS09260</i>                              | WP_067429133.1, 275 aa | ABC transporter substrate-binding protein           | -176 ~ -167                                         |
| <i>SLINC_RS33920</i>                              | WP_067441376.1, 327 aa | sugar ABC transporter permease                      | -428 ~ -419                                         |
| <i>SLINC_RS37445</i>                              | WP_067446118.1, 135 aa | vicinal oxygen chelate (VOC) family protein         | -322 ~ -313                                         |
| <i>SLINC_RS38630</i>                              | WP_067443078.1, 478 aa | DHA2 family efflux MFS transporter permease subunit | -346 ~ -337                                         |

**sigma factor**

*SLINC\_RS33145* WP\_067445952.1, 511 aa RNA polymerase sigma factor +95 ~ +104

*SLINC\_RS34875* WP\_067441886.1, 201 aa sigma-70 family RNA polymerase -549 ~ -540

**others**

*SLINC\_RS05745* WP\_067427571.1, 256 aa methyltransferase domain-containing  
protein -492 ~ -483

*SLINC\_RS23180* WP\_067436406.1, 574 aa methionine--tRNA ligase -215 ~ -206

*SLINC\_RS33340* WP\_067441084.1, 194 aa PaaI family thioesterase -281 ~ -272

---

597 **a** TRSS translational start site

598



599 **Table 3** Strains contain all the homologues of LmbU, SLINC\_RS02575, SLINC\_RS05540 and SLINC\_RS42780.

600

| Strains                               | LmbU         | SLINC_RS02575 | SLINC_RS05540 | SLINC_RS42780 |
|---------------------------------------|--------------|---------------|---------------|---------------|
|                                       | Identity (%) | Identity (%)  | Identity (%)  | Identity (%)  |
| <i>Streptomyces violaceoruber</i>     | 73.08        | 83.81         | 62.67         | 83.39         |
| <i>Kutzneria buriramensis</i>         | 57.38        | 52.94         | 30.91         | 57.14         |
| <i>Streptomyces antibioticus</i>      | 54.19        | 79.31         | 68.03         | 86.10         |
| <i>Streptomyces hokutonensis</i>      | 53.29        | 80.85         | 65.94         | 89.04         |
| <i>Streptomyces javensis</i>          | 52.53        | 30.00         | 54.10         | 91.36         |
| <i>Streptomyces griseorubiginosus</i> | 52.20        | 80.08         | 69.78         | 90.67         |
| <i>Streptomyces rhizosphaericus</i>   | 51.90        | 33.90         | 55.32         | 91.03         |
| <i>Streptomyces vinaceus</i>          | 51.40        | 56.57         | 42.19         | 88.33         |
| <i>Streptomyces albicerus</i>         | 50.27        | 75.15         | 68.58         | 92.36         |
| <i>Streptomyces xylophagus</i>        | 36.82        | 80.65         | 65.83         | 62.85         |

601

## Regulators

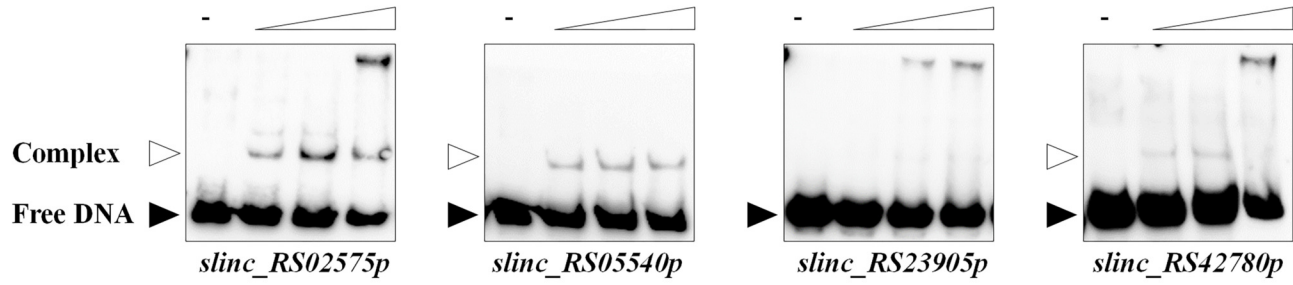

## Transporters

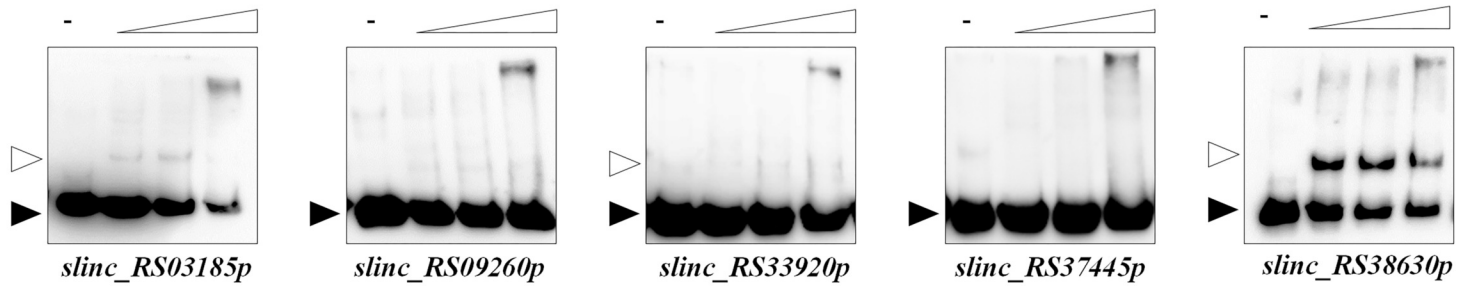

## Sigma factors and others

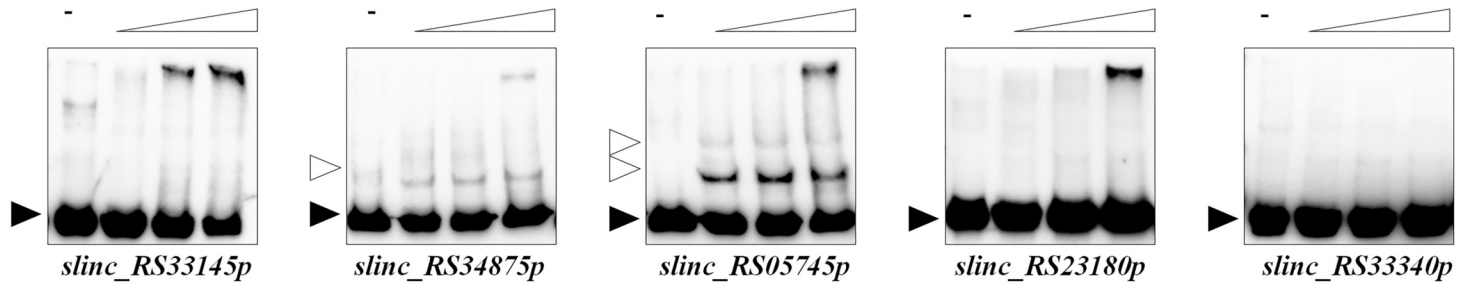

## Regulators

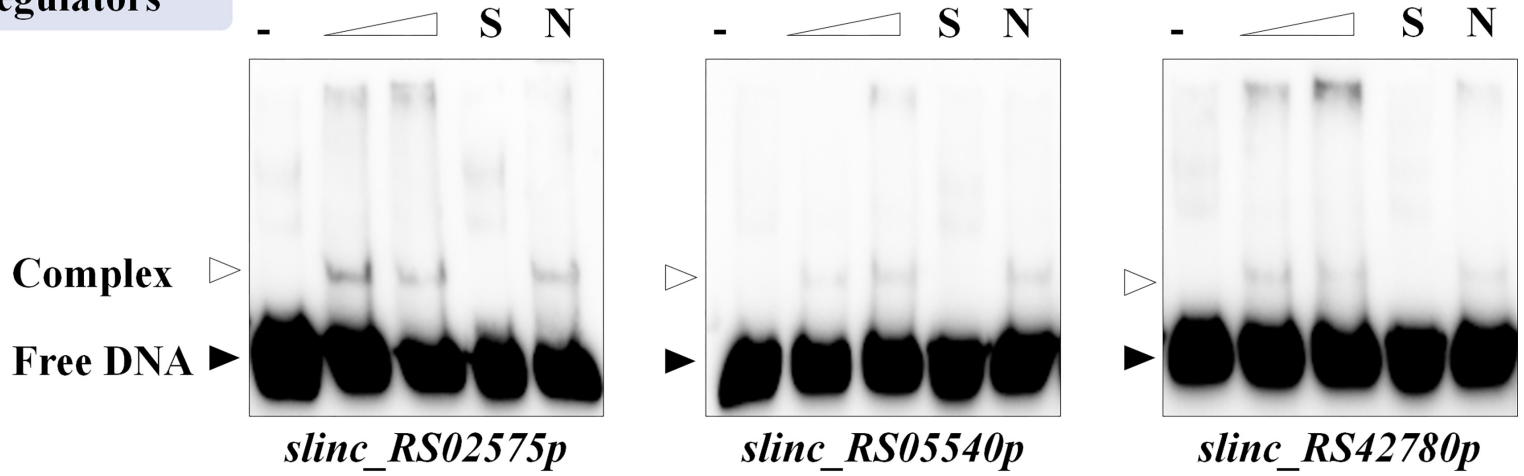

## Transporters

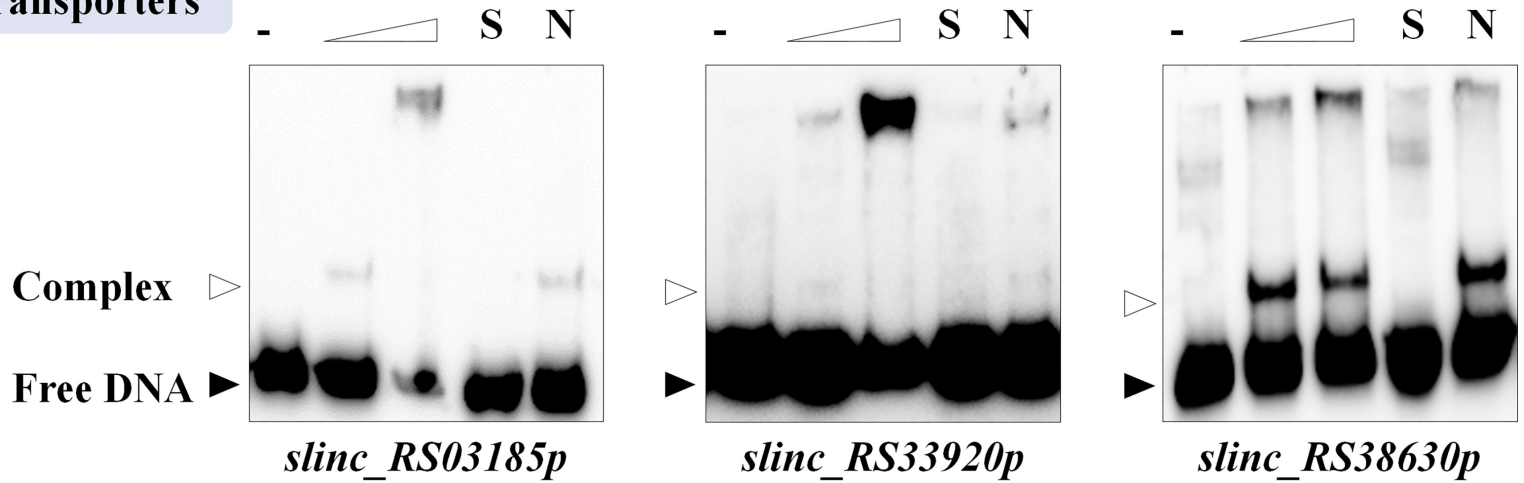

## Sigma factors and others

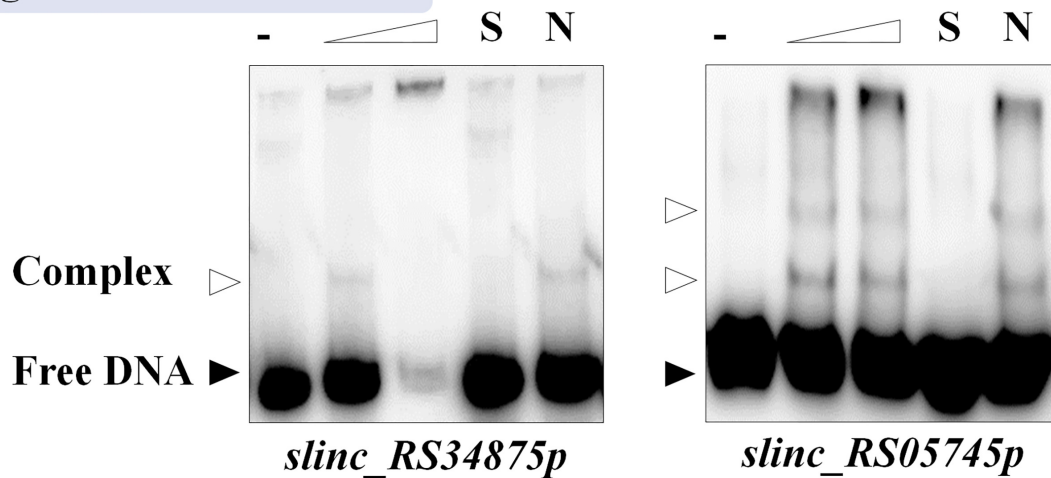

**A**

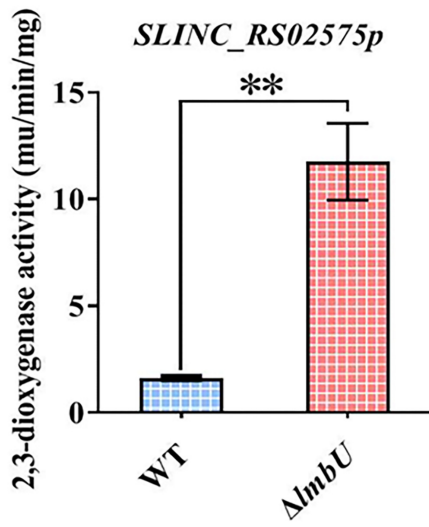

**B**

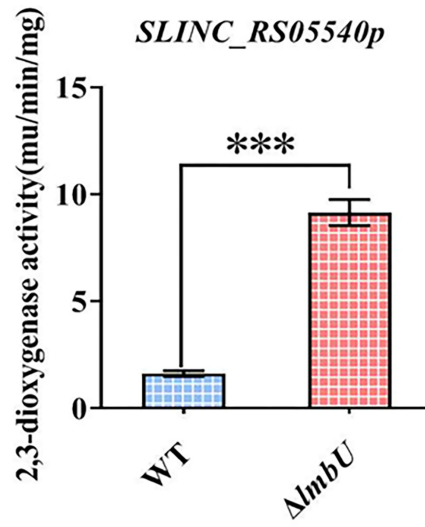

**C**

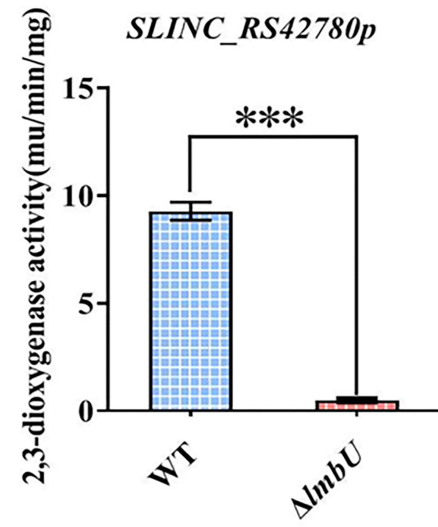

**A**

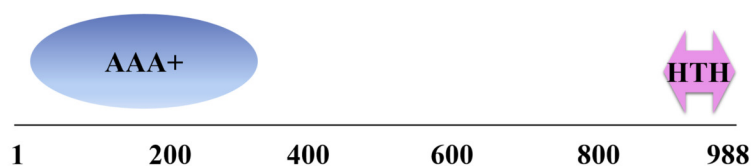

**B**

|    | Walker A |   |   |   | Walker B |   |   |   |   |   |   |   |   |   |   |   |    |   |
|----|----------|---|---|---|----------|---|---|---|---|---|---|---|---|---|---|---|----|---|
| 1  | G        | D | A | G | V        | G | K | T | R | V | L | L | L | L | V | L | E  | D |
| 2  | G        | G | M | G | C        | G | K | S | T | F | L | L | A | I | G | I | D  | D |
| 3  | G        | P | I | A | S        | G | K | T | A | L | L | V | L | I | G | V | D  | D |
| 4  | G        | G | P | G | V        | G | K | A | T | L | L | L | V | I | A | V | D  | D |
| 5  | G        | P | L | A | C        | G | K | T | T | L | L | L | L | L | A | V | D  | D |
| 6  | G        | P | A | G | S        | G | K | T | E | L | L | F | L | V | A | V | D  | D |
| 7  | G        | A | A | S | T        | G | K | T | E | L | L | A | L | I | T | V | D  | D |
| 8  | G        | P | D | G | I        | G | K | S | A | L | L | L | L | L | A | V | D  | D |
| 9  | G        | P | A | G | I        | G | K | S | A | L | L | L | V | L | A | L | D  | D |
| 10 | G        | R | P | G | F        | G | H | N | A | L | L | T | L | V | T | V | E  | D |
|    | *        |   |   |   | **       |   |   |   |   |   |   |   |   |   |   |   | ** | * |

**C**

|    | HTH |   |   |   |   |   |   |   |   |   |   |   |   |   |   |   |   |   |   |   |   |   |   |   |   |   |   |   |   |   |   |   |   |   |   |   |   |   |   |   |   |   |   |   |   |   |   |   |   |   |   |
|----|-----|---|---|---|---|---|---|---|---|---|---|---|---|---|---|---|---|---|---|---|---|---|---|---|---|---|---|---|---|---|---|---|---|---|---|---|---|---|---|---|---|---|---|---|---|---|---|---|---|---|---|
| 1  | L   | T | A | R | E | E | D | V | L | R | L | L | A | L | G | R | S | N | R | Q | I | G | E | E | L | F | I | T | G | K | T | A | S | V | H | V | S | N | I | L | A | K | L | S | A | T | S | R | T | E | A |
| 2  | L   | S | E | S | E | M | R | V | A | T | L | A | A | G | G | N | T | N | R | E | I | A | G | R | L | C | V | T | V | S | T | V | E | Q | H | L | T | R | V | Y | R | K | L | N | I | T | R | R | R | E | L |
| 3  | L   | T | E | S | E | R | R | V | S | A | L | A | A | V | G | R | T | N | R | E | I | A | D | H | L | F | V | T | A | S | T | V | E | Q | H | L | T | N | V | F | R | K | L | G | V | K | G | R | Q | Q | L |
| 4  | L   | S | E | A | E | W | R | V | A | T | L | A | A | S | R | M | T | N | R | Q | I | A | K | S | L | Y | I | T | V | S | T | V | E | Q | H | L | T | R | V | Y | R | K | L | S | V | G | N | R | Q | D | L |
| 5  | L   | T | H | S | E | R | R | V | A | S | L | A | A | M | G | Y | T | N | R | E | I | A | G | K | L | Y | V | T | A | S | T | V | E | Q | H | L | T | R | V | F | R | K | L | D | I | K | H | R | E | Q | L |
| 6  | L   | S | E | A | E | R | R | V | A | A | L | A | A | R | G | L | T | N | R | Q | I | A | R | R | L | C | V | T | A | S | T | V | E | Q | H | L | T | R | V | Y | R | K | L | N | V | T | R | R | A | D | L |
| 7  | L   | S | R | A | E | R | R | V | A | T | L | A | S | A | G | Y | T | N | R | A | I | A | E | K | L | F | V | T | E | S | T | V | E | Q | H | L | T | K | V | Y | R | K | L | G | V | K | H | R | E | D | L |
| 8  | L   | T | R | S | Q | S | Q | V | A | R | L | A | A | E | G | A | S | N | A | E | I | A | E | T | L | F | V | T | Q | R | T | V | E | V | H | L | T | S | A | Y | R | K | L | G | V | S | G | R | R | E | L |
| 9  | L   | T | G | M | E | R | T | V | A | S | L | A | A | G | G | A | G | N | R | S | I | A | Q | S | L | Y | V | S | V | R | T | V | E | M | H | L | T | S | V | Y | R | K | L | G | I | A | E | R | A | Q | L |
| 10 | L   | S | P | A | E | R | Q | T | A | E | L | A | C | G | G | L | G | N | R | Q | I | A | E | Q | L | S | V | S | R | R | T | V | E | L | R | L | S | S | T | Y | K | K | L | R | I | A | S | R | E | E | L |

**A**

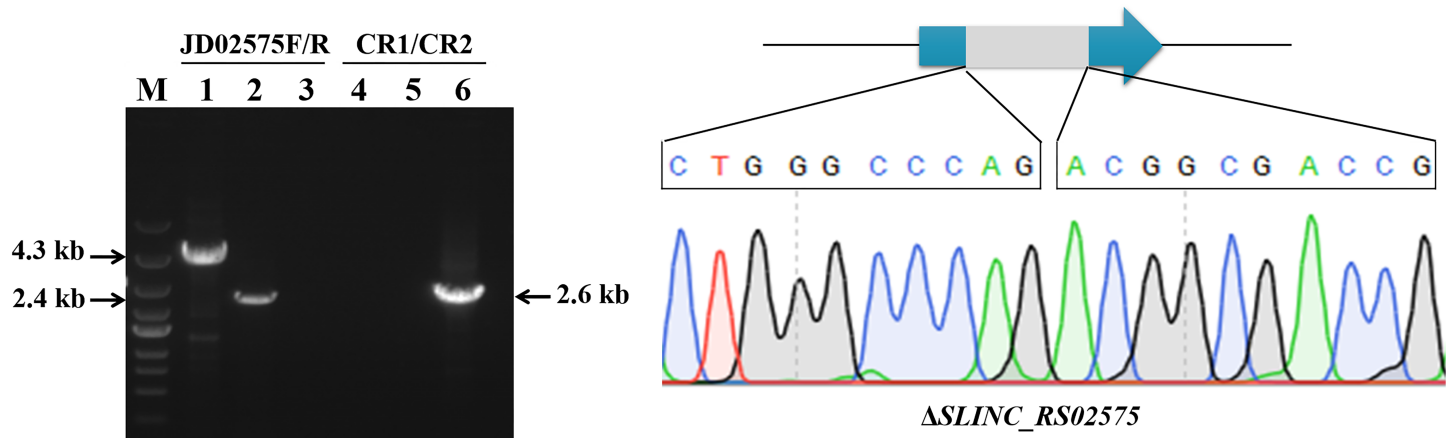

**B**

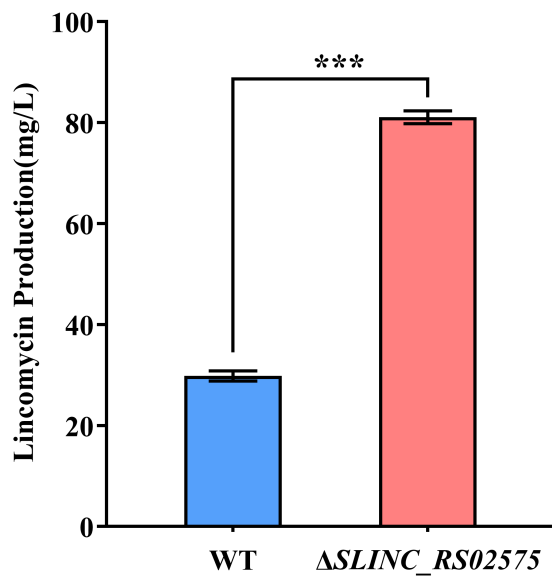

**C**

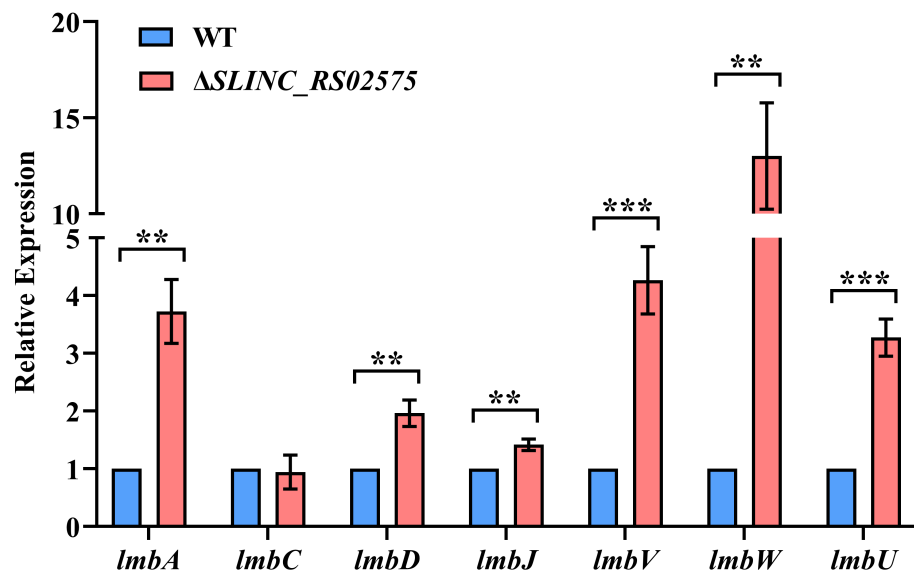

**A**

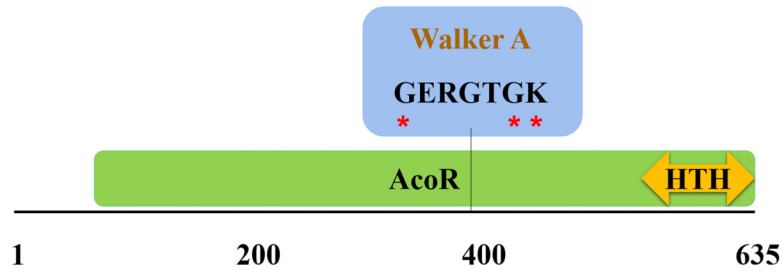

**B**

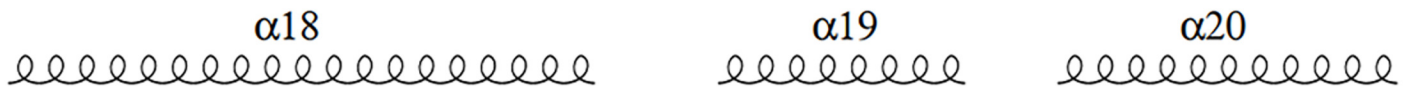

| 5m7n.1 | L | R | E | A | R | E | R | F | E | K | E | Y | L | I | A | Q | I | N | R | F | G | G | N | I | S | R | T | A | E | F | V | G | M | E | R | S | A | L | H | R | K | L | K | S | L | G | V |
|--------|---|---|---|---|---|---|---|---|---|---|---|---|---|---|---|---|---|---|---|---|---|---|---|---|---|---|---|---|---|---|---|---|---|---|---|---|---|---|---|---|---|---|---|---|---|---|---|
| 1      | P | L | S | P | M | E | H | A | E | R | A | T | I | L | E | T | L | R | L | H | G | G | N | K | A | R | T | A | A | A | L | G | I | A | R | A | T | L | Y | R | K | L | R | G | Y | R | G |
| 2      | P | L | S | P | M | E | Q | A | E | R | A | A | I | L | E | A | L | R | R | H | G | G | N | K | A | R | T | A | A | A | L | G | I | A | R | A | T | L | Y | R | K | L | R | G | Y | Q | . |
| 3      | P | L | S | P | M | E | H | A | E | R | A | A | I | L | D | A | L | R | R | H | G | G | N | K | A | R | T | A | A | A | L | G | I | A | R | A | T | L | Y | R | K | L | R | G | Y | R | G |
| 4      | R | L | T | P | M | E | H | A | E | R | A | A | I | L | E | A | L | R | R | H | G | G | N | K | A | R | T | A | A | A | L | G | I | A | R | A | T | L | Y | R | K | L | R | G | Y | R | G |
| 5      | R | L | S | P | M | E | H | A | E | R | S | A | I | L | E | A | L | R | R | N | G | G | N | K | A | R | T | A | A | S | L | G | I | A | R | A | T | L | Y | R | K | L | R | G | Y | R | G |
| 6      | H | L | S | P | M | E | H | A | E | R | T | A | I | L | E | A | L | R | R | N | G | G | N | K | A | R | A | A | A | L | G | I | A | R | A | T | L | Y | R | K | L | R | G | Y | R | G |   |

**A**

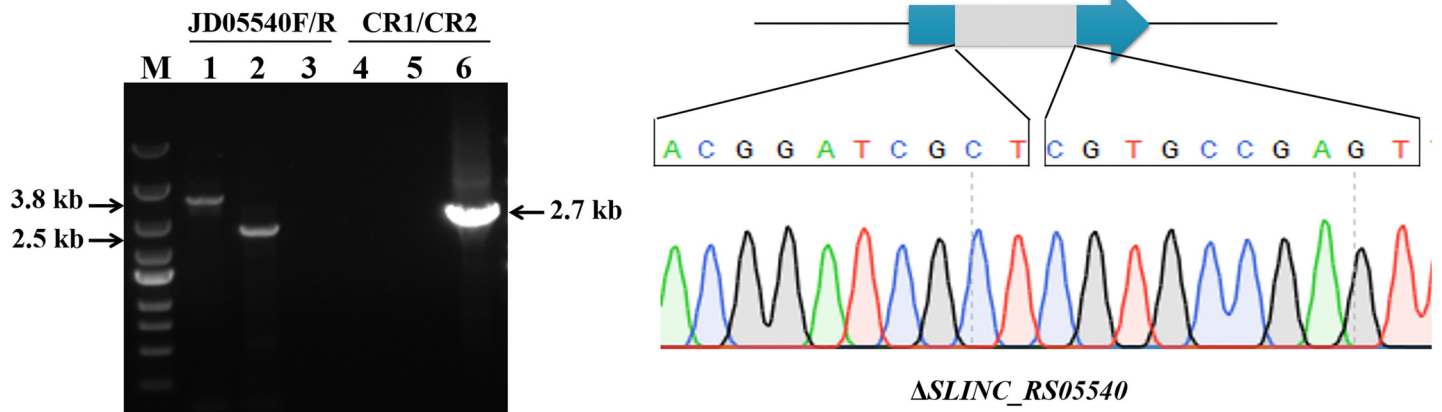

**B**

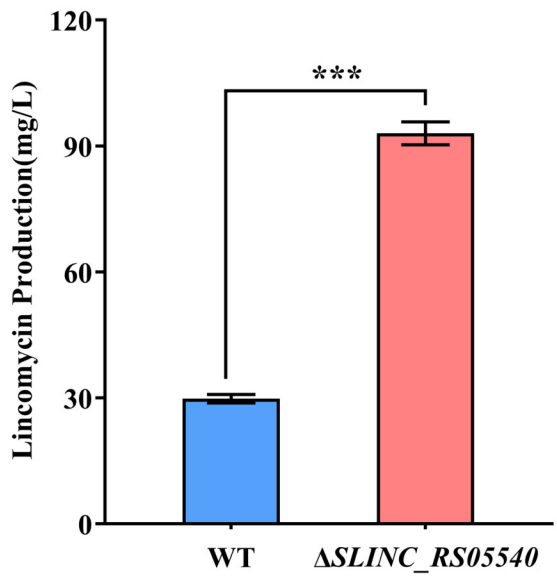

**C**

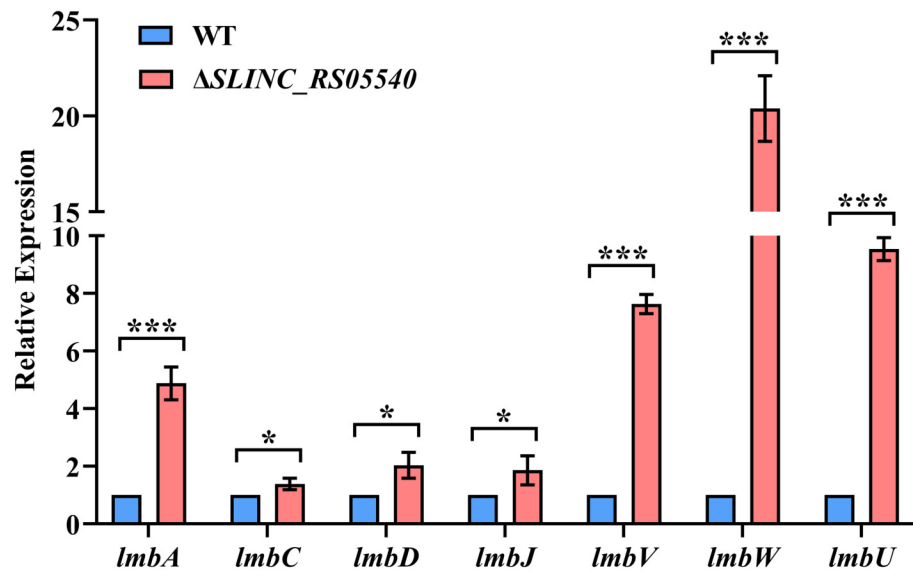



A

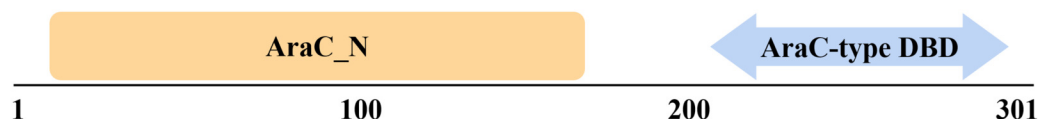

B

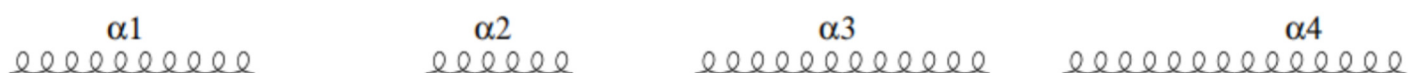

3w6v.1

|   |       |         |          |       |    |          |        |          |      |       |      |       |        |       |   |
|---|-------|---------|----------|-------|----|----------|--------|----------|------|-------|------|-------|--------|-------|---|
|   | . . . | LAEV    | VAWALE   | EHLHE | EQ | FDVETLA  | ARAYMS | RRTF     | DRRF | FRSL  | TGSA | PLQ   | WLITQ  | RVLQA | Q |
| 1 | L     | SHISRAV | LWIREHYA | Q     | S  | FRVEDVAR | MSGMS  | VSAFYRNF | QAV  | TAMSP | PIQ  | FQKQI | RLQEAR |       |   |
| 2 | L     | SHVSRAV | RWIREHYA | Q     | P  | FRVEDVAR | MSGMS  | VSAFYRNF | QAV  | TAMSP | PIQ  | FQKQI | RLQEAR |       |   |
| 3 | L     | SHVSRAV | RWIREHYA | E     | P  | FRVDEVAR | MAGMS  | VSAFYRNF | QAV  | TAMSP | PIQ  | FQKQI | RLQEAR |       |   |
| 4 | L     | SHVSRAV | RWIREHYA | E     | P  | FRVEDVAR | LSGMS  | VSAFYRNF | QAV  | TAMSP | PIQ  | FQKQI | RLQEAR |       |   |
| 5 | L     | SHVSRAV | RWIREHYA | E     | P  | FRVEDVAR | LSGMS  | VSAFYRNF | QAV  | TAMSP | PIQ  | FQKQI | RLQEAR |       |   |
| 6 | L     | SHISRAV | RWIREHYA | Q     | P  | FRVEDVAR | MSGMS  | VSAFYRNF | QAV  | TAMSP | PIQ  | FQKQI | RLQEAR |       |   |

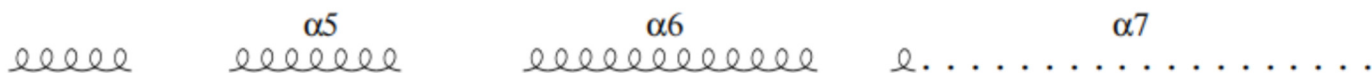

3w6v.1

|   |   |    |        |     |       |       |          |      |       |   |        |   |   |   |   |   |   |   |   |   |   |   |
|---|---|----|--------|-----|-------|-------|----------|------|-------|---|--------|---|---|---|---|---|---|---|---|---|---|---|
|   | R | LL | ETSDYS | VDE | VAGRC | GFRSP | PVALRGHF | RRQL | GSSP  | . | .      | . | . | . | . |   |   |   |   |   |   |   |
| 1 | L | LL | ATHPGD | VTG | VGHRV | GYDNP | SQFSREY  | RRQF | GAPPS | Q | DAARLR | H | S | V | H | T | Q | A | G | V | L | P |
| 2 | L | LL | ATHPGD | VTG | VGHRV | GYDNP | SQFSREY  | RRQF | GAPPS | Q | DAARLR | H | T | V | P | T | T | A | G | V | L | P |
| 3 | L | LL | ATQPGD | VTG | VGHRV | GYDNP | SQFSREY  | RRRF | GAPPS | Q | DAARLR | Q | A | V | R | T | P | A | G | V | L | P |
| 4 | L | LL | ATHPGD | VTG | VGHRV | GYDNP | SQFSREY  | RRQF | GAPPS | R | DAARLR | N | T | A | R | T | P | A | S | V | L | P |
| 5 | L | LL | ATHPGD | VTG | VGHRV | GYDNP | SQFSREY  | RRQF | GAPPS | K | DAVRLR | Q | A | V | R | T | P | S | G | V | L | P |
| 6 | L | LL | ATHPGD | VTG | VGQRV | GYDNP | SQFSREY  | RRQF | GAPPS | L | DAARLR | D | T | A | R | T | P | A | G | I | L | P |

**A**

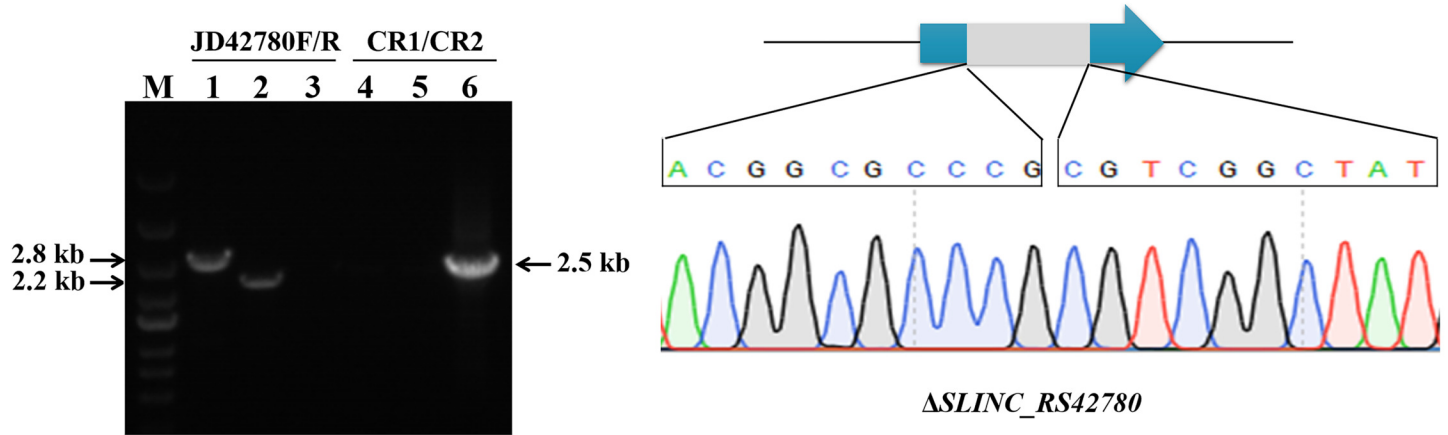

**B**

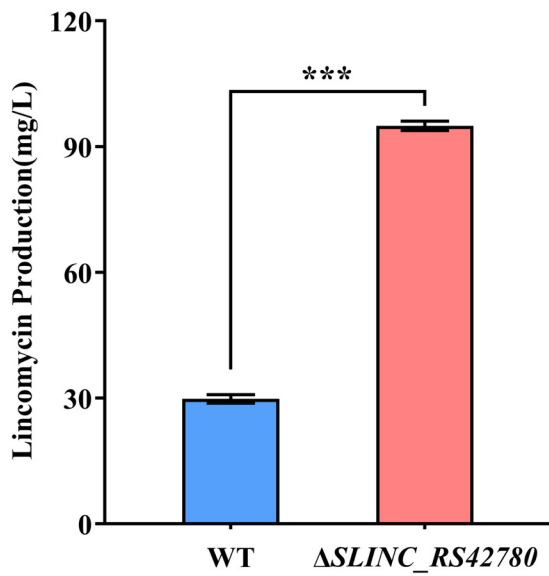

**C**

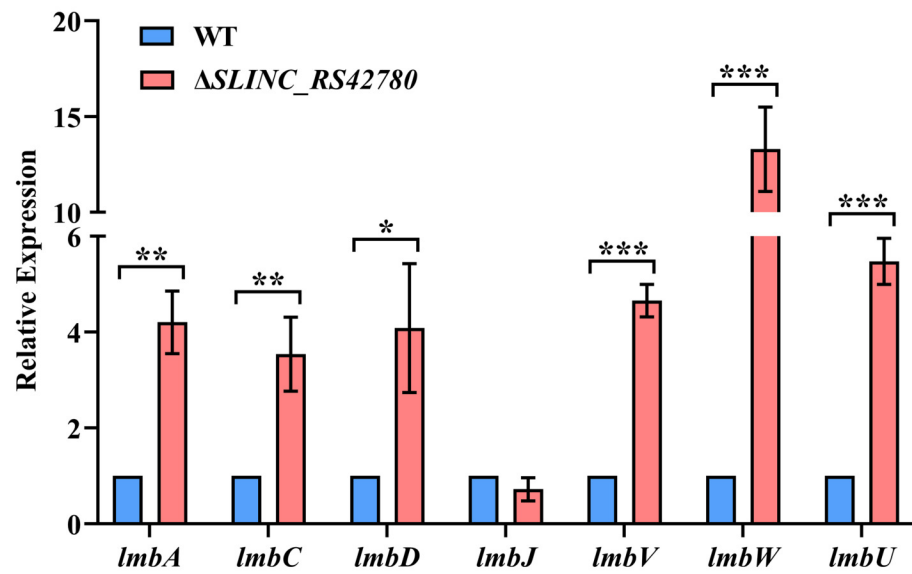

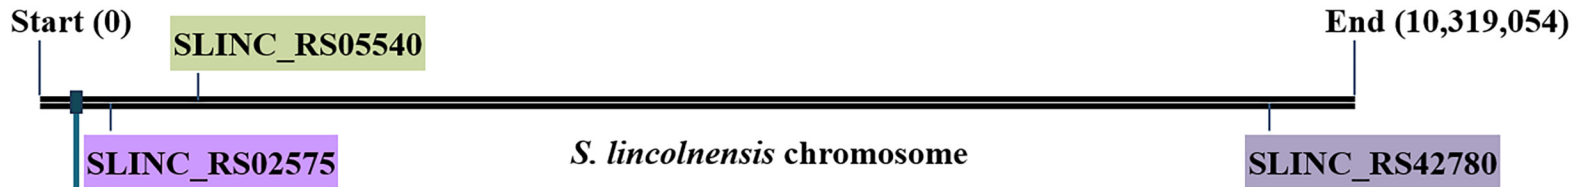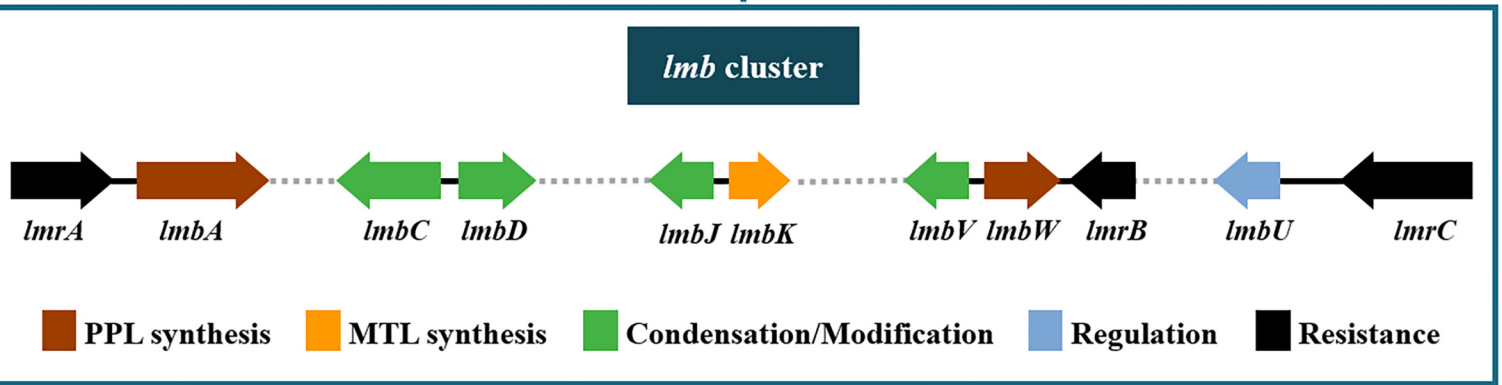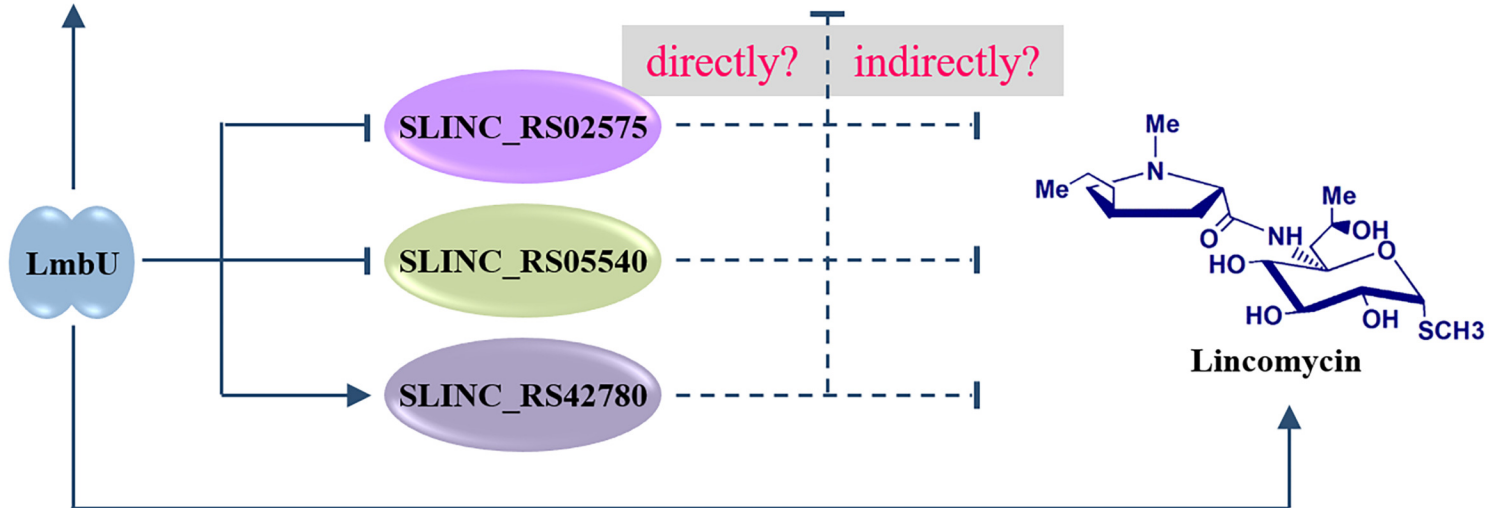

Source: http://biorxiv.org/content/10.1101/2021.06.17.448913v1.full.pdf
